# Supplementary material for: Spatial and temporal shifts in the diet of the barnacle Amphibalanus eburneus within a subtropical estuary
Source: PeerJ. 2018 Aug 15;6:e5485. doi: 10.7717/peerj.5485 (PMC6098678; doi:10.7717/peerj.5485)
Supplement: Supplemental Information 1 [file peerj-06-5485-s001.xlsx]

## Sheet: raw barnacle data
Collection Period	Lagoon	Site	Species	Size (mm)	d13C	%C	d15N	%N	C/N
Spring 2015	Banana	B1	A. eburneus	11	-21.3844	38.21	9.314	8.78672	4.3486
Spring 2015	Banana	B1	A. eburneus	8	-22.233	40.6442	8.726	7.89179	5.15019
Spring 2015	Banana	B1	A. eburneus	9	-20.6574	37.7912	10.025	8.84717	4.27155
Spring 2015	Banana	B1	A. eburneus	10	-20.8228	32.6891	9.917	8.04264	4.06447
Spring 2015	Banana	B1	A. eburneus	8	-20.0334	37.4302	9.575	9.00811	4.15517
Spring 2015	Banana	B1	A. eburneus	9	-20.2539	33.1617	9.39	8.3101	3.99053
Spring 2015	Banana	B1	A. eburneus	10	-20.4712	27.574	8.996	6.58728	4.18594
Spring 2015	Banana	B1	A. eburneus	9	-21.1275	34.9067	9.873	8.59252	4.06245
Spring 2015	Banana	B1	A. eburneus	10	-21.3126	32.9396	9.933	7.65315	4.30406
Spring 2015	Banana	B1	A. eburneus	9	-20.8269	33.2422	9.547	8.36117	3.97579
Fall 2015	Banana	B1	A. eburneus	7	-20.0152	32.7066	8.85319	7.86245	4.15985
Fall 2015	Banana	B1	A. eburneus	8	-20.2592	33.9949	8.3983	8.68764	3.91302
Fall 2015	Banana	B1	A. eburneus	9	-20.4225	34.1866	8.2508	7.68157	4.45047
Fall 2015	Banana	B1	A. eburneus	9	-21.393	36.4764	7.47768	9.68588	3.76594
Fall 2015	Banana	B1	A. eburneus	10	-19.5302	34.1092	9.04234	8.66035	3.93854
Fall 2015	Banana	B1	A. eburneus	8	-20.307	34.1545	8.1407	8.65965	3.9441
Fall 2015	Banana	B1	A. eburneus	8	-19.6921	32.4856	8.4477	8.19878	3.96225
Fall 2015	Banana	B1	A. eburneus	9	-20.053	34.0793	8.82075	8.71775	3.90918
Fall 2015	Banana	B1	A. eburneus	4	-21.1606	23.9879	8.06249	5.88762	4.0743
Fall 2015	Banana	B1	A. eburneus	5	-21.2415	31.9952	7.91243	8.04033	3.97933
Winter 2015	Banana	B1	A. eburneus	7.4	-21.2334	37.3385	8.97183	7.85638	4.75263
Winter 2015	Banana	B1	A. eburneus	7.4	-20.1798	37.8811	10.0108	8.55107	4.42999
Winter 2015	Banana	B1	A. eburneus	7.4	-20.8089	38.9375	8.55925	8.17404	4.76356
Winter 2015	Banana	B1	A. eburneus	7.4	-22.457	23.6	7.85595	5.84883	4.03499
Winter 2015	Banana	B1	A. eburneus	7.4	-21.2222	39.1248	8.1077	8.95888	4.36715
Winter 2015	Banana	B1	A. eburneus	7.4	-21.323	38.9487	8.72808	9.56675	4.07126
Winter 2015	Banana	B1	A. eburneus	7.4	-20.4434	37.5525	8.72408	7.38263	5.0866
Winter 2015	Banana	B1	A. eburneus	7.4	-21.2985	35.8535	8.51429	8.12148	4.41465
Winter 2015	Banana	B1	A. eburneus	7.4	-22.1811	39.4015	8.31449	8.55823	4.60393
Winter 2015	Banana	B1	A. eburneus	7.4	-22.4988	41.745	8.45435	10.1454	4.11466
Winter 2015	Banana	B1	A. eburneus	7.4	-23.5442	40.8543	8.15365	7.70608	5.30157
Winter 2015	Banana	B1	A. eburneus	7.4	-22.8451	35.45	7.25448	8.2818	4.28047
Winter 2016-Bloom	Banana	B1	A. eburneus	10	-18.8923	33.3941	10.7629	6.11027	5.46523
Winter 2016-Bloom	Banana	B1	A. eburneus	9	-18.991	31.0698	10.9879	7.81444	3.97595
Winter 2016-Bloom	Banana	B1	A. eburneus	9	-19.2137	35.405	11.2599	8.14171	4.34859
Winter 2016-Bloom	Banana	B1	A. eburneus	8	-19.6477	34.8286	10.7324	8.58901	4.05502
Winter 2016-Bloom	Banana	B1	A. eburneus	5	-19.0409	37.1972	12.6031	9.48569	3.9214
Winter 2016-Bloom	Banana	B1	A. eburneus	5	-18.3991	37.5447	12.6887	9.95254	3.77237
Winter 2016-Bloom	Banana	B1	A. eburneus	7	-18.927	40.44	10.9263	10.3141	3.92086
Winter 2016-Bloom	Banana	B1	A. eburneus	8	-19.7286	39.2148	11.2068	9.6302	4.07206
Winter 2016-Bloom	Banana	B1	A. eburneus	6	-18.7613	32.216	12.1789	8.35319	3.85673
Winter 2016-Bloom	Banana	B1	A. eburneus	8	-19.9827	38.5483	10.6094	8.14527	4.7326
Summer 2015	Banana	B1	A. eburneus	6	-18.7361	37.1912	10.1693	7.66275	4.85351
Summer 2015	Banana	B1	A. eburneus	6	-18.4857	36.7517	9.83745	8.12236	4.52475
Summer 2015	Banana	B1	A. eburneus	5	-18.1625	37.6399	9.83176	9.03277	4.16704
Summer 2015	Banana	B1	A. eburneus	4	-18.3698	33.2586	9.81445	8.35329	3.9815
Summer 2015	Banana	B1	A. eburneus	7	-18.5334	35.4657	9.96897	8.17529	4.33816
Summer 2015	Banana	B1	A. eburneus	7	-18.5651	35.4164	9.53509	8.49049	4.17131
Summer 2015	Banana	B1	A. eburneus	10	-18.5799	35.2611	9.33308	8.72298	4.04232
Summer 2015	Banana	B1	A. eburneus	8	-18.3738	36.6026	9.72685	8.95705	4.08646
Summer 2015	Banana	B1	A. eburneus	9	-18.4001	35.9145	10.3682	8.31767	4.31786
Summer 2015	Banana	B1	A. eburneus	6	-18.1417	36.1124	10.3751	8.87434	4.0693
Spring 2015	Banana	B2	A. eburneus	10	-22.009	38.4805	10.5872	9.53693	4.03489
Spring 2015	Banana	B2	A. eburneus	9	-21.754	39.3113	11.1792	9.92584	3.9605
Spring 2015	Banana	B2	A. eburneus	10	-21.6332	39.0457	11.5215	10.0781	3.8743
Spring 2015	Banana	B2	A. eburneus	10	-21.8237	37.997	11.0797	9.70504	3.91518
Spring 2015	Banana	B2	A. eburneus	8	-21.5247	38.3271	11.2568	9.9232	3.86237
Spring 2015	Banana	B2	A. eburneus	10	-21.9527	38.782	10.812	9.88137	3.92477
Spring 2015	Banana	B2	A. eburneus	9	-21.37	38.0487	10.822	9.45614	4.02371
Spring 2015	Banana	B2	A. eburneus	9	-21.8493	41.284	11.4538	9.89265	4.1732
Spring 2015	Banana	B2	A. eburneus	9	-21.6516	35.7523	11.007	9.25582	3.86268
Spring 2015	Banana	B2	A. eburneus	8	-21.4816	37.58	10.9732	9.57769	3.9237
Winter 2015	Banana	B2	A. eburneus	6.2	-21.0783	35.792	10.1681	8.41349	4.25412
Winter 2015	Banana	B2	A. eburneus	6.2	-21.4162	41.5455	10.4173	9.30646	4.46416
Winter 2015	Banana	B2	A. eburneus	6.2	-20.9864	33.2926	10.1098	8.04671	4.13742
Winter 2015	Banana	B2	A. eburneus	6.2	-20.1563	34.8235	10.2917	8.61129	4.04393
Winter 2015	Banana	B2	A. eburneus	6.2	-21.5132	34.7974	9.63945	8.54104	4.07414
Winter 2015	Banana	B2	A. eburneus	6.2	-20.7505	32.3555	10.7289	7.37015	4.39007
Winter 2015	Banana	B2	A. eburneus	6.2	-21.6715	34.2689	9.66457	8.36114	4.09859
Winter 2015	Banana	B2	A. eburneus	6.2	-21.8491	36.7727	9.51884	9.04417	4.0659
Winter 2015	Banana	B2	A. eburneus	6.2	-21.4111	33.3229	9.28267	8.31824	4.006
Winter 2015	Banana	B2	A. eburneus	6.2	-21.0578	30.0162	10.561	7.20668	4.16505
Winter 2015	Banana	B2	A. eburneus	6.2	-21.0772	28.4902	9.9319	6.42418	4.43484
Winter 2015	Banana	B2	A. eburneus	6.2	-20.8353	33.4343	9.53693	8.12476	4.11511
Winter 2016-Bloom	Banana	B2	A. eburneus	8	-19.0053	40.0712	12.9952	10.5944	3.78231
Winter 2016-Bloom	Banana	B2	A. eburneus	7	-18.8081	41.8317	13.7635	11.1085	3.76573
Winter 2016-Bloom	Banana	B2	A. eburneus	7	-20.7634	35.9628	11.9291	8.70169	4.13285
Winter 2016-Bloom	Banana	B2	A. eburneus	7	-20.5291	34.7567	11.1209	9.30703	3.73446
Winter 2016-Bloom	Banana	B2	A. eburneus	6	-20.1124	40.363	13.9947	10.8369	3.72458
Winter 2016-Bloom	Banana	B2	A. eburneus	7	-21.068	39.5505	15.1624	10.5463	3.75017
Winter 2016-Bloom	Banana	B2	A. eburneus	7	-21.6162	35.4546	13.3477	8.87571	3.99456
Winter 2016-Bloom	Banana	B2	A. eburneus	7	-20.64	35.0233	13.3263	9.54761	3.66828
Winter 2016-Bloom	Banana	B2	A. eburneus	7	-20.371	35.6193	12.6052	9.45302	3.76803
Winter 2016-Bloom	Banana	B2	A. eburneus	7	-19.6674	36.9679	12.6961	10.3521	3.57107
Fall 2015	Banana	B2Alt	A. eburneus	9	-21.2755	49.8321	7.09912	8.11786	6.13858
Fall 2015	Banana	B2Alt	A. eburneus	7	-22.7019	36.5405	7.42565	9.33998	3.91227
Fall 2015	Banana	B2Alt	A. eburneus	8	-21.2842	37.0146	8.11167	10.0188	3.69451
Fall 2015	Banana	B2Alt	A. eburneus	7	-21.213	20.5711	11.7808	4.4654	4.60678
Fall 2015	Banana	B2Alt	A. eburneus	5	-21.1535	35.0134	7.22327	9.1602	3.82234
Fall 2015	Banana	B2Alt	A. eburneus	4	-21.0813	39.4347	7.38848	10.5782	3.7279
Fall 2015	Banana	B2Alt	A. eburneus	9	-19.6545	17.4666	10.5494	4.31234	4.05039
Fall 2015	Banana	B2Alt	A. eburneus	9	-20.4606	23.4849	10.2379	6.17085	3.80578
Fall 2015	Banana	B2Alt	A. eburneus	10	-21.5615	26.2028	10.0987	6.96192	3.76373
Fall 2015	Banana	B2Alt	A. eburneus	9	-21.1593	33.3182	11.0037	8.70088	3.82929
Summer 2015	Banana	B2alt	A. eburneus	13	-18.9484	35.0532	9.45758	8.07854	4.33905
Summer 2015	Banana	B2alt	A. eburneus	9	-18.503	30.9995	10.2202	8.08862	3.83249
Summer 2015	Banana	B2alt	A. eburneus	13	-18.5145	32.5387	10.1946	8.36072	3.89185
Summer 2015	Banana	B2alt	A. eburneus	14	-18.7902	34.7311	10.1296	8.39119	4.13899
Summer 2015	Banana	B2alt	A. eburneus	12	-18.9148	28.233	10.4359	7.09083	3.98163
Summer 2015	Banana	B2alt	A. eburneus	10	-18.8411	35.1435	9.51599	8.45834	4.15489
Summer 2015	Banana	B2alt	A. eburneus	14	-18.7976	31.8738	9.41997	7.65977	4.1612
Summer 2015	Banana	B2alt	A. eburneus	10	-18.7447	26.4152	10.9853	6.6858	3.95094
Summer 2015	Banana	B2alt	A. eburneus	11	-18.657	35.8647	9.35059	8.69873	4.12299
Summer 2015	Banana	B2alt	A. eburneus	13	-18.2417	33.8899	9.16246	8.52485	3.97542
Spring 2015	Banana	B4	A. eburneus	7	-19.0095	34.0436	8.19713	8.51632	3.99746
Spring 2015	Banana	B4	A. eburneus	8	-19.5915	32.7226	8.46018	7.99308	4.09387
Spring 2015	Banana	B4	A. eburneus	7	-19.7009	34.2704	8.55556	7.592	4.51402
Spring 2015	Banana	B4	A. eburneus	8	-19.124	32.5517	8.06962	8.00032	4.06879
Spring 2015	Banana	B4	A. eburneus	6	-18.8268	34.4357	8.37383	8.46938	4.06591
Spring 2015	Banana	B4	A. eburneus	6	-19.2499	32.1912	8.03749	8.36994	3.84605
Spring 2015	Banana	B4	A. eburneus	7	-19.382	33.2766	8.08267	8.24591	4.03552
Spring 2015	Banana	B4	A. eburneus	8	-19.3707	31.2948	8.6178	7.86346	3.97977
Spring 2015	Banana	B4	A. eburneus	5	-18.6927	32.7664	7.27445	8.11699	4.03677
Spring 2015	Banana	B4	A. eburneus	6	-19.0869	30.4856	8.03448	7.33533	4.15599
Fall 2015	Banana	B4	A. eburneus	9	-19.7131	15.9851	9.82194	3.34856	4.77372
Fall 2015	Banana	B4	A. eburneus	5	-20.3894	34.7408	9.87354	9.05496	3.83666
Fall 2015	Banana	B4	A. eburneus	5	-19.7208	10.9971	9.26951	3.0127	3.65026
Fall 2015	Banana	B4	A. eburneus	4	-20.6918	29.4469	9.6854	7.53142	3.90987
Fall 2015	Banana	B4	A. eburneus	7	-20.0771	26.2481	10.7304	5.36658	4.89104
Fall 2015	Banana	B4	A. eburneus	6	-19.719	32.7973	10.4698	8.48466	3.86548
Fall 2015	Banana	B4	A. eburneus	4	-20.2962	33.0024	8.70221	8.54331	3.86295
Fall 2015	Banana	B4	A. eburneus	4	-20.6895	33.5783	8.89039	8.73655	3.84343
Winter 2015	Banana	B4	A. eburneus	7	-21.4158	32.4738	7.91961	8.01455	4.05186
Winter 2015	Banana	B4	A. eburneus	7	-20.899	35.2496	8.86288	8.51745	4.13852
Winter 2015	Banana	B4	A. eburneus	7	-21.4213	33.2521	7.57376	8.3487	3.9829
Winter 2015	Banana	B4	A. eburneus	7	-21.2132	33.6847	8.27266	8.40095	4.00963
Winter 2015	Banana	B4	A. eburneus	7	-21.1183	27.3842	7.0972	6.65975	4.11189
Winter 2015	Banana	B4	A. eburneus	7	-20.643	33.9113	8.52291	8.56878	3.95755
Winter 2015	Banana	B4	A. eburneus	7	-21.0735	31.5581	7.81902	8.1889	3.85377
Winter 2015	Banana	B4	A. eburneus	7	-21.2877	36.9544	7.96558	9.11118	4.05594
Winter 2015	Banana	B4	A. eburneus	7	-20.8939	33.5845	8.48103	8.6653	3.87574
Winter 2015	Banana	B4	A. eburneus	7	-20.8552	28.7622	8.11414	7.24269	3.97121
Winter 2015	Banana	B4	A. eburneus	7	-21.5845	36.5451	8.7562	8.54325	4.27766
Winter 2015	Banana	B4	A. eburneus	7	-21.6712	35.4398	8.37934	7.72982	4.58482
Summer 2015	Banana	B4	A. eburneus	8	-18.413	31.2268	8.53747	7.54909	4.13649
Summer 2015	Banana	B4	A. eburneus	9	-19.0084	32.7552	8.06089	6.62996	4.94048
Summer 2015	Banana	B4	A. eburneus	8	-18.3383	31.436	10.6031	8.056	3.90218
Summer 2015	Banana	B4	A. eburneus	7	-18.4392	31.946	10.4686	8.32541	3.83717
Summer 2015	Banana	B4	A. eburneus	8	-18.976	33.4583	10.1235	7.23665	4.62345
Summer 2015	Banana	B4	A. eburneus	7	-18.4157	31.813	10.4001	8.1589	3.89917
Summer 2015	Banana	B4	A. eburneus	8	-18.6226	21.2971	9.89532	5.21991	4.07998
Summer 2015	Banana	B4	A. eburneus	8	-18.7441	32.0191	10.0556	7.75438	4.12916
Summer 2015	Banana	B4	A. eburneus	9	-18.6683	30.671	10.217	7.37477	4.15891
Summer 2015	Banana	B4	A. eburneus	5	-18.5324	30.9037	10.6073	7.3755	4.19005
Summer 2015	Banana	B4	A. eburneus	8	-18.5988	32.5185	9.60264	8.25199	3.94068
Spring 2015	Banana	B5	A. eburneus	8	-18.5997	24.1172	8.51411	5.66704	4.2557
Spring 2015	Banana	B5	A. eburneus	9	-19.8518	35.385	8.96837	9.10009	3.88842
Spring 2015	Banana	B5	A. eburneus	8	-19.7968	37.4159	9.43853	9.56042	3.91362
Spring 2015	Banana	B5	A. eburneus	7	-19.6167	38.2655	9.22879	9.81148	3.90007
Spring 2015	Banana	B5	A. eburneus	8	-19.975	36.2684	9.01707	9.19808	3.94304
Spring 2015	Banana	B5	A. eburneus	10	-19.3866	33.5869	9.10852	8.77832	3.82612
Spring 2015	Banana	B5	A. eburneus	9	-19.7714	33.643	8.50019	8.85822	3.79794
Spring 2015	Banana	B5	A. eburneus	10	-19.41	36.4899	9.29937	9.38451	3.88831
Spring 2015	Banana	B5	A. eburneus	9	-19.917	36.9106	9.20096	9.51305	3.88
Spring 2015	Banana	B5	A. eburneus	8	-20.0004	35.345	8.7139	9.22209	3.83264
Fall 2015	Banana	B5	A. eburneus	7	-22.5805	34.4275	7.29325	8.54094	4.03089
Fall 2015	Banana	B5	A. eburneus	7	-22.201	14.0806	7.81833	3.37426	4.17294
Fall 2015	Banana	B5	A. eburneus	10	-20.635	31.1147	7.44766	8.22789	3.78162
Fall 2015	Banana	B5	A. eburneus	8	-21.2309	29.1884	6.60882	7.33168	3.98114
Fall 2015	Banana	B5	A. eburneus	9	-22.4076	37.8903	7.11183	8.87289	4.27034
Fall 2015	Banana	B5	A. eburneus	7	-22.2181	35.1079	6.99414	9.13737	3.84223
Fall 2015	Banana	B5	A. eburneus	8	-21.9745	33.2656	7.44652	7.85264	4.23623
Fall 2015	Banana	B5	A. eburneus	6	-23.2387	38.4025	7.62931	9.31524	4.12254
Fall 2015	Banana	B5	A. eburneus	7	-21.9316	37.6403	7.16668	9.67159	3.89184
Fall 2015	Banana	B5	A. eburneus		-21.3475	28.3349	6.58708	7.15772	3.95865
Winter 2015	Banana	B5	A. eburneus	6.8	-21.9133	25.512	7.55111	6.07586	4.19892
Winter 2015	Banana	B5	A. eburneus	6.8	-22.8578	33.2649	7.55312	7.7647	4.28412
Winter 2015	Banana	B5	A. eburneus	6.8	-23.3995	25.8395	7.49874	4.63355	5.57661
Winter 2015	Banana	B5	A. eburneus	6.8	-22.5896	33.2686	7.99419	7.96305	4.17787
Winter 2015	Banana	B5	A. eburneus	6.8	-22.4468	31.3156	8.12812	5.29309	5.91632
Winter 2015	Banana	B5	A. eburneus	6.8	-21.5043	32.9459	7.83105	8.02719	4.10429
Winter 2015	Banana	B5	A. eburneus	6.8	-22.2305	33.5093	7.18859	8.21157	4.08074
Winter 2015	Banana	B5	A. eburneus	6.8	-20.1263	12.8174	8.54401	2.99207	4.28379
Winter 2015	Banana	B5	A. eburneus	6.8	-22.7773	35.6863	7.47256	8.04469	4.43601
Winter 2015	Banana	B5	A. eburneus	6.8	-22.662	30.5425	7.8955	7.62086	4.00775
Winter 2015	Banana	B5	A. eburneus	6.8	-23.0261	35.2001	7.63368	8.01391	4.39237
Winter 2015	Banana	B5	A. eburneus	6.8	-23.3984	24.5986	7.5642	5.74395	4.28252
Winter 2016-Bloom	Banana	B5	A. eburneus	6	-20.632	36.7936	10.6298	8.39937	4.38052
Winter 2016-Bloom	Banana	B5	A. eburneus	6	-20.8885	36.4939	10.2007	9.202	3.96586
Winter 2016-Bloom	Banana	B5	A. eburneus	5	-20.6845	34.7474	8.60822	9.05697	3.83654
Winter 2016-Bloom	Banana	B5	A. eburneus	7	-20.8415	37.2163	9.5261	8.76573	4.24566
Winter 2016-Bloom	Banana	B5	A. eburneus	6	-20.979	40.478	10.0608	9.35319	4.32772
Winter 2016-Bloom	Banana	B5	A. eburneus	7	-20.4777	35.9482	10.7414	9.08945	3.95494
Winter 2016-Bloom	Banana	B5	A. eburneus	6	-20.8466	35.674	10.5712	8.78607	4.06029
Winter 2016-Bloom	Banana	B5	A. eburneus	6	-20.6541	33.0238	10.0826	8.2226	4.01622
Winter 2016-Bloom	Banana	B5	A. eburneus	5	-21.048	35.2166	9.2254	8.87125	3.96975
Summer 2015	Banana	B5	A. eburneus	11	-19.5233	31.7197	8.5185	7.35271	4.31401
Summer 2015	Banana	B5	A. eburneus	10	-19.5332	34.9916	8.66527	8.2946	4.2186
Summer 2015	Banana	B5	A. eburneus	9	-19.427	31.0449	8.46186	7.59798	4.08594
Summer 2015	Banana	B5	A. eburneus	10	-20.26	35.2819	8.35841	6.36432	5.54371
Summer 2015	Banana	B5	A. eburneus	14	-19.4158	30.0355	8.15612	7.17915	4.18371
Summer 2015	Banana	B5	A. eburneus	9	-19.3773	33.7265	8.59161	8.33201	4.04782
Summer 2015	Banana	B5	A. eburneus	10	-19.4995	32.3832	8.37182	7.71108	4.19956
Summer 2015	Banana	B5	A. eburneus	9	-20.239	37.2758	8.53049	7.64578	4.87534
Summer 2015	Banana	B5	A. eburneus	9	-19.6784	33.4045	8.36835	7.58867	4.4019
Summer 2015	Banana	B5	A. eburneus	10	-19.4615	31.6268	8.75971	7.95623	3.9751
Spring 2015	Banana	B6	A. eburneus	8.5	-23.715	35.1317	8.752	6.14806	5.71427
Spring 2015	Banana	B6	A. eburneus	9	-22.5356	40.9391	9.02	9.01211	4.54268
Spring 2015	Banana	B6	A. eburneus	8	-22.492	41.696	9.024	8.72895	4.77675
Spring 2015	Banana	B6	A. eburneus	8	-22.622	37.495	8.914	8.43218	4.44665
Spring 2015	Banana	B6	A. eburneus	8	-22.0229	35.1658	8.454	7.9678	4.41349
Spring 2015	Banana	B6	A. eburneus	9	-22.6188	32.6607	8.847	7.81145	4.18113
Fall 2015	Banana	B6	A. eburneus	8	-21.7928	33.0766	8.66236	8.63195	3.83188
Fall 2015	Banana	B6	A. eburneus	7	-22.0517	31.6027	8.43208	8.06187	3.92002
Fall 2015	Banana	B6	A. eburneus	7	-22.1897	32.7972	8.60438	8.38867	3.90971
Fall 2015	Banana	B6	A. eburneus	8	-21.8512	32.6164	8.6207	8.29073	3.93408
Fall 2015	Banana	B6	A. eburneus	7	-22.4727	30.8432	9.43902	7.8647	3.92172
Fall 2015	Banana	B6	A. eburneus	8	-21.9962	33.0993	8.599	8.57341	3.86069
Fall 2015	Banana	B6	A. eburneus	7	-21.5706	32.678	8.15621	8.14755	4.01078
Fall 2015	Banana	B6	A. eburneus	8	-21.8118	33.4053	8.96195	8.57734	3.8946
Fall 2015	Banana	B6	A. eburneus	7	-22.1474	33.763	8.84314	8.46936	3.98649
Fall 2015	Banana	B6	A. eburneus	7	-22.1127	32.0793	9.22388	8.2723	3.87792
Winter 2015	Banana	B6	A. eburneus	8.4	-23.5514	31.5699	9.14418	7.7927	4.05122
Winter 2015	Banana	B6	A. eburneus	8.4	-23.7891	31.8302	9.40197	7.31214	4.35306
Winter 2015	Banana	B6	A. eburneus	8.4	-23.58	30.7811	10.269	7.09199	4.34026
Winter 2015	Banana	B6	A. eburneus	8.4	-23.2628	31.204	9.53993	7.60129	4.1051
Winter 2015	Banana	B6	A. eburneus	8.4	-23.7259	26.1907	9.19352	6.14554	4.26174
Winter 2015	Banana	B6	A. eburneus	8.4	-23.5726	29.3814	9.40126	7.27961	4.03613
Winter 2015	Banana	B6	A. eburneus	8.4	-23.4337	33.854	9.15302	8.24525	4.10588
Winter 2015	Banana	B6	A. eburneus	8.4	-23.2969	25.54	10.0535	6.25183	4.08521
Winter 2015	Banana	B6	A. eburneus	8.4	-23.9115	35.0047	9.38217	8.45255	4.14131
Winter 2015	Banana	B6	A. eburneus	8.4	-23.3143	31.3869	9.32186	7.48949	4.19079
Winter 2015	Banana	B6	A. eburneus	8.4	-23.9565	29.2947	9.14096	7.04663	4.15727
Winter 2015	Banana	B6	A. eburneus	8.4	-23.9616	25.4231	9.49573	5.59205	4.5463
Summer 2015	Banana	B6	A. eburneus	8	-20.645	35.8993	9.02224	8.69001	4.1311
Summer 2015	Banana	B6	A. eburneus	10	-20.711	32.2052	9.37769	7.54223	4.26999
Summer 2015	Banana	B6	A. eburneus	9	-20.61	33.5448	9.11397	8.06616	4.15871
Summer 2015	Banana	B6	A. eburneus	9	-21.0015	33.796	8.83162	7.9438	4.25439
Summer 2015	Banana	B6	A. eburneus	9	-21.0245	34.7922	8.77705	7.85746	4.42792
Summer 2015	Banana	B6	A. eburneus	8	-20.4479	33.5149	9.26069	8.35851	4.00968
Summer 2015	Banana	B6	A. eburneus	8	-20.2528	34.2187	9.65657	8.84013	3.87083
Summer 2015	Banana	B6	A. eburneus	7	-20.6166	32.1347	9.23829	8.16617	3.9351
Summer 2015	Banana	B6	A. eburneus	9	-20.8394	31.4983	9.11081	7.69259	4.09463
Summer 2015	Banana	B6	A. eburneus	8	-20.3747	30.9888	9.21371	7.79275	3.97662
Spring 2015	Banana	B6alt	A. eburneus	7	-21.3608	35.9208	9.39514	8.01559	4.48136
Spring 2015	Banana	B6alt	A. eburneus	7	-21.412	38.9305	9.81305	9.01471	4.31856
Spring 2015	Banana	B6alt	A. eburneus	6	-21.3721	36.5143	9.74339	9.07	4.02583
Spring 2015	Banana	B6alt	A. eburneus	7	-21.0208	37.4111	9.8827	9.05277	4.13255
Spring 2015	Banana	B6alt	A. eburneus	6	-20.9748	38.7251	9.44091	9.43569	4.10411
Spring 2015	Banana	B6alt	A. eburneus	6	-20.8928	36.4335	9.99513	8.95158	4.07006
Spring 2015	Banana	B6alt	A. eburneus	6	-21.1919	35.5473	10.0598	8.82917	4.02612
Spring 2015	Banana	B6alt	A. eburneus	6	-21.1878	34.4966	9.93742	8.09245	4.26281
Spring 2015	Banana	B6alt	A. eburneus	5	-21.0925	40.1366	9.61305	9.49699	4.22625
Spring 2015	Banana	B6alt	A. eburneus	7	-20.7945	38.2743	9.72349	9.5184	4.02109
Fall 2015	Banana	B6Alt	A. eburneus	4	-20.2075	31.8092	9.24056	8.1975	3.88035
Fall 2015	Banana	B6Alt	A. eburneus	5	-20.1117	33.4255	8.98839	8.37384	3.99165
Fall 2015	Banana	B6Alt	A. eburneus	4	-19.8036	22.0644	9.56552	6.05238	3.64557
Fall 2015	Banana	B6Alt	A. eburneus	4	-20.384	34.4067	9.4979	9.00528	3.82073
Winter 2015	Banana	B6alt	A. eburneus	5.2	-21.8644	32.8262	9.44166	8.04152	4.08209
Winter 2015	Banana	B6alt	A. eburneus	5.2	-21.3949	22.9859	9.31111	5.75959	3.99089
Winter 2015	Banana	B6alt	A. eburneus	5.2	-21.5465	30.1067	9.46785	7.59256	3.96529
Winter 2015	Banana	B6alt	A. eburneus	5.2	-21.2004	33.0588	9.50708	8.10724	4.07769
Winter 2015	Banana	B6alt	A. eburneus	5.2	-22.1356	26.3161	8.90549	6.18527	4.25464
Summer 2015	Banana	B6alt	A. eburneus	7	-19.3031	32.3569	10.4919	8.16527	3.96275
Summer 2015	Banana	B6alt	A. eburneus	5	-19.3863	32.9484	10.1418	8.31026	3.96478
Summer 2015	Banana	B6alt	A. eburneus	9	-19.3898	34.9848	10.5878	8.74512	4.0005
Summer 2015	Banana	B6alt	A. eburneus	6	-19.16	34.1934	9.81229	8.80446	3.88365
Summer 2015	Banana	B6alt	A. eburneus	8	-19.5514	28.9951	10.1754	7.2656	3.99073
Summer 2015	Banana	B6alt	A. eburneus	6	-19.4506	33.1375	9.91572	8.54359	3.87864
Summer 2015	Banana	B6alt	A. eburneus	8	-19.5557	33.4584	10.1263	8.71601	3.83874
Summer 2015	Banana	B6alt	A. eburneus	7	-19.3542	35.0913	10.3061	8.9855	3.90533
Summer 2015	Banana	B6alt	A. eburneus	7	-19.4164	35.1075	10.2003	8.87043	3.95781
Summer 2015	Banana	B6alt	A. eburneus	8	-19.7711	34.7489	10.1052	7.87525	4.41242
Spring 2015	Banana	B7	A. eburneus	10	-21.3016	36.6555	9.67803	8.3379	4.39626
Spring 2015	Banana	B7	A. eburneus	9	-22.0611	36.0682	10.0515	8.79893	4.09915
Spring 2015	Banana	B7	A. eburneus	11	-22.8836	38.642	9.00836	6.49777	5.94697
Spring 2015	Banana	B7	A. eburneus	10	-20.864	32.1089	9.0194	8.13043	3.94923
Spring 2015	Banana	B7	A. eburneus	13	-21.6772	38.152	9.40092	8.29844	4.59749
Spring 2015	Banana	B7	A. eburneus	12	-22.2479	38.37	8.92804	7.009	5.47439
Spring 2015	Banana	B7	A. eburneus	10	-22.0281	37.5211	8.62885	7.41073	5.06307
Spring 2015	Banana	B7	A. eburneus	11	-21.8217	35.7944	8.91499	7.66008	4.67286
Spring 2015	Banana	B7	A. eburneus	10	-22.2624	39.4916	9.01539	7.81174	5.05542
Spring 2015	Banana	B7	A. eburneus	12	-22.4574	37.0928	9.18406	6.89902	5.37652
Fall 2015	Banana	B7	A. eburneus	5	-19.0133	34.0255	9.83876	8.74939	3.88891
Fall 2015	Banana	B7	A. eburneus	7	-19.728	41.5561	9.96745	8.37544	4.96166
Fall 2015	Banana	B7	A. eburneus	6	-18.5415	35.1486	9.64171	8.58987	4.09187
Fall 2015	Banana	B7	A. eburneus	4	-18.7359	34.059	9.81398	8.81669	3.86301
Fall 2015	Banana	B7	A. eburneus	7	-19.554	31.598	9.75544	6.56675	4.81182
Fall 2015	Banana	B7	A. eburneus	5	-18.6012	34.9473	9.49483	8.81112	3.96627
Fall 2015	Banana	B7	A. eburneus	7	-19.1373	36.2761	9.76019	8.70117	4.1691
Fall 2015	Banana	B7	A. eburneus	7	-18.5861	36.133	10.1494	8.93311	4.04484
Fall 2015	Banana	B7	A. eburneus	5	-18.7717	36.3142	9.80801	9.42676	3.85225
Fall 2015	Banana	B7	A. eburneus	6	-19.4448	37.8922	9.62284	8.15473	4.64665
Winter 2015	Banana	B7	A. eburneus		-22.7911	36.4852	9.25357	8.66603	4.21014
Winter 2015	Banana	B7	A. eburneus		-22.2295	37.2848	9.34009	8.811	4.23161
Winter 2015	Banana	B7	A. eburneus		-23.226	36.1674	8.74554	8.65364	4.17944
Winter 2015	Banana	B7	A. eburneus		-22.2163	25.7308	9.22741	6.04526	4.25636
Winter 2015	Banana	B7	A. eburneus		-22.8697	33.9023	9.06746	7.67702	4.41607
Winter 2015	Banana	B7	A. eburneus		-22.2694	36.5182	8.86324	8.95529	4.07784
Winter 2015	Banana	B7	A. eburneus		-20.2948	33.1886	9.91552	8.34702	3.97611
Winter 2015	Banana	B7	A. eburneus		-22.0978	33.8556	9.43767	8.39795	4.03142
Winter 2015	Banana	B7	A. eburneus		-22.7053	36.2995	8.95278	8.85248	4.10049
Winter 2015	Banana	B7	A. eburneus		-22.7707	35.5727	9.13687	8.09278	4.39561
Summer 2015	Banana	B7	A. eburneus	8	-18.1543	28.9094	10.6922	7.37238	3.92131
Summer 2015	Banana	B7	A. eburneus	8	-18.1757	30.4642	9.96392	7.9974	3.80927
Summer 2015	Banana	B7	A. eburneus	9	-18.2583	35.9751	9.61484	9.51542	3.78072
Summer 2015	Banana	B7	A. eburneus	10	-18.1991	35.1667	9.47566	9.35666	3.75847
Summer 2015	Banana	B7	A. eburneus	11	-18.6093	35.0252	9.22798	8.68299	4.03377
Summer 2015	Banana	B7	A. eburneus	7	-18.1129	38.2218	9.75349	9.93723	3.84632
Summer 2015	Banana	B7	A. eburneus	8	-18.093	36.2207	9.45092	9.8268	3.68591
Summer 2015	Banana	B7	A. eburneus	7	-17.8944	34.9049	9.6687	9.59362	3.63834
Summer 2015	Banana	B7	A. eburneus	11	-18.0677	26.8267	9.21215	7.14175	3.75632
Summer 2015	Banana	B7	A. eburneus	11	-18.062	33.4858	9.485	8.99576	3.72239
Fall 2015	Banana	B8	A. eburneus	9	-20.9665	34.6304	9.71531	8.39983	4.12275
Fall 2015	Banana	B8	A. eburneus	5	-20.5774	36.4036	9.87192	9.60934	3.78836
Fall 2015	Banana	B8	A. eburneus	5	-20.9562	36.8546	10.2743	9.36994	3.93328
Fall 2015	Banana	B8	A. eburneus	5	-20.5599	34.0834	10.2565	9.18676	3.71005
Fall 2015	Banana	B8	A. eburneus	4	-20.5903	38.2158	9.9286	10.1965	3.74795
Fall 2015	Banana	B8	A. eburneus	6	-20.8776	35.835	10.6227	9.35623	3.83007
Fall 2015	Banana	B8	A. eburneus	4	-20.4648	35.0645	9.592	9.02809	3.88393
Fall 2015	Banana	B8	A. eburneus	5	-20.4563	38.1498	10.0073	10.2122	3.73571
Winter 2016-Bloom	Banana	B8	A. eburneus	5	-19.5626	39.7293	10.5185	10.0103	3.96883
Winter 2016-Bloom	Banana	B8	A. eburneus	5	-18.7747	40.4019	10.7712	10.4184	3.87793
Winter 2016-Bloom	Banana	B8	A. eburneus	5	-19.9461	42.3976	10.7694	9.48111	4.47179
Winter 2016-Bloom	Banana	B8	A. eburneus	6	-18.92	40.6316	11.4898	10.573	3.84297
Winter 2016-Bloom	Banana	B8	A. eburneus	5	-19.3622	23.459	10.089	5.46005	4.29649
Winter 2016-Bloom	Banana	B8	A. eburneus	8	-19.4218	40.1424	10.539	9.36202	4.28779
Winter 2016-Bloom	Banana	B8	A. eburneus	6	-18.9158	40.5463	10.86	9.73186	4.16635
Winter 2016-Bloom	Banana	B8	A. eburneus		-19.5887	40.2839	10.8	9.70703	4.14997
Summer 2015	Banana	B8	A. eburneus	9	-19.9023	34.1515	8.50079	8.73928	3.90782
Summer 2015	Banana	B8	A. eburneus	10	-19.8604	35.2569	8.16602	8.61834	4.09091
Summer 2015	Banana	B8	A. eburneus	11	-20.2042	38.8477	8.42167	9.76051	3.98009
Summer 2015	Banana	B8	A. eburneus	16	-19.4823	33.7246	8.30678	8.28308	4.07151
Summer 2015	Banana	B8	A. eburneus	16	-19.985	37.4057	8.4567	9.67666	3.86556
Summer 2015	Banana	B8	A. eburneus	13	-19.9283	33.8865	8.46349	8.3861	4.04079
Summer 2015	Banana	B8	A. eburneus	7	-19.9989	38.4512	8.11297	9.70155	3.9634
Summer 2015	Banana	B8	A. eburneus	7	-19.6794	34.3132	8.46643	9.08135	3.77843
Summer 2015	Banana	B8	A. eburneus	8	-20.1905	33.3966	8.33707	8.20392	4.07081
Summer 2015	Banana	B8	A. eburneus	10	-19.5767	32.7497	9.03764	7.57449	4.32368
Spring 2015	Banana	B9	A. eburneus	12	-20.6761	38.5957	10.4244	9.96805	3.87195
Spring 2015	Banana	B9	A. eburneus	12	-21.1052	35.1932	10.1689	8.47549	4.15235
Spring 2015	Banana	B9	A. eburneus	10	-21.1641	36.5443	10.3472	9.16319	3.98816
Spring 2015	Banana	B9	A. eburneus	11	-20.7412	35.6806	10.6027	9.32948	3.8245
Spring 2015	Banana	B9	A. eburneus	11	-20.5603	37.9275	10.5847	10.0054	3.7907
Spring 2015	Banana	B9	A. eburneus	12	-21.1331	33.6792	10.0356	8.28805	4.06358
Spring 2015	Banana	B9	A. eburneus	12	-21.13	39.2073	10.5306	10.3221	3.79839
Spring 2015	Banana	B9	A. eburneus	11	-21.1486	30.9281	11.4073	7.42252	4.16679
Spring 2015	Banana	B9	A. eburneus	11	-21.3937	35.5729	10.6989	8.55923	4.15609
Fall 2015	Banana	B9	A. eburneus	9	-21.582	34.3374	11.6066	8.0582	4.26118
Fall 2015	Banana	B9	A. eburneus	9	-20.7241	35.1567	10.6029	8.81868	3.98662
Fall 2015	Banana	B9	A. eburneus	7	-20.8667	36.9949	10.7575	9.53771	3.8788
Fall 2015	Banana	B9	A. eburneus	7	-20.3848	35.3259	10.493	8.99828	3.92584
Fall 2015	Banana	B9	A. eburneus	7	-22.7629	38.7461	11.1322	5.13812	7.54091
Fall 2015	Banana	B9	A. eburneus	6	-21.8144	26.3453	11.9545	4.77934	5.51232
Fall 2015	Banana	B9	A. eburneus	7	-22.6969	25.9785	11.9703	3.6165	7.18334
Winter 2015	Banana	B9	A. eburneus	7.6	-23.6949	27.2421	9.78511	5.63133	4.83759
Winter 2015	Banana	B9	A. eburneus	7.6	-23.3674	31.0709	9.36338	7.1728	4.33176
Winter 2015	Banana	B9	A. eburneus	7.6	-23.1757	26.8509	9.84393	6.55899	4.09376
Winter 2015	Banana	B9	A. eburneus	7.6	-23.4868	31.5999	10.0812	6.93657	4.55555
Winter 2015	Banana	B9	A. eburneus	7.6	-23.2175	32.4389	10.2208	8.00484	4.05241
Winter 2015	Banana	B9	A. eburneus	7.6	-22.936	34.6864	9.74922	8.13917	4.26166
Winter 2015	Banana	B9	A. eburneus	7.6	-24.1161	40.9119	9.82399	6.84227	5.97929
Winter 2015	Banana	B9	A. eburneus	7.6	-22.6055	33.2739	9.68541	7.83567	4.24647
Winter 2015	Banana	B9	A. eburneus	7.6	-24.874	39.6296	9.94164	6.85166	5.78395
Winter 2015	Banana	B9	A. eburneus	7.6	-22.5321	32.6364	9.51093	7.7728	4.1988
Winter 2015	Banana	B9	A. eburneus	7.6	-24.5149	29.5457	9.81203	5.73721	5.14984
Winter 2015	Banana	B9	A. eburneus	7.6	-22.9758	25.4315	9.95859	6.02777	4.21905
Winter 2016-Bloom	Banana	B9	A. eburneus	5	-19.4591	38.8821	10.5904	9.9487	3.90826
Winter 2016-Bloom	Banana	B9	A. eburneus	6	-19.8814	40.1041	11.4042	10.1605	3.94708
Winter 2016-Bloom	Banana	B9	A. eburneus	7	-19.6978	41.7858	9.8457	10.894	3.83565
Winter 2016-Bloom	Banana	B9	A. eburneus	5	-19.4221	39.0912	10.1549	10.0792	3.87839
Winter 2016-Bloom	Banana	B9	A. eburneus	5	-19.8413	39.4369	10.4657	9.59796	4.10889
Winter 2016-Bloom	Banana	B9	A. eburneus	9	-20.133	43.4229	11.8677	10.2067	4.25433
Winter 2016-Bloom	Banana	B9	A. eburneus	7	-19.5522	39.4039	11.5929	9.61941	4.09629
Winter 2016-Bloom	Banana	B9	A. eburneus	7	-19.5689	36.191	11.2017	9.22095	3.92486
Winter 2016-Bloom	Banana	B9	A. eburneus	6	-19.7956	38.3572	11.1433	9.64715	3.97601
Summer 2015	Banana	B9	A. eburneus	11	-20.8803	29.4387	8.91375	4.6171	6.37602
Summer 2015	Banana	B9	A. eburneus	7	-20.0327	34.4271	8.54943	8.8827	3.87575
Summer 2015	Banana	B9	A. eburneus	12	-21.3068	35.314	8.50796	8.0032	4.41249
Summer 2015	Banana	B9	A. eburneus	10	-21.2729	36.0519	8.50344	7.31102	4.93117
Summer 2015	Banana	B9	A. eburneus	8	-20.8277	38.2862	8.395	8.10378	4.72448
Summer 2015	Banana	B9	A. eburneus	10	-20.8831	33.5906	8.00399	7.76676	4.32492
Summer 2015	Banana	B9	A. eburneus	8	-19.8557	35.9923	8.64626	8.82055	4.0805
Summer 2015	Banana	B9	A. eburneus	9	-20.2633	43.4825	8.77576	8.97852	4.84294
Summer 2015	Banana	B9	A. eburneus	10	-21.5591	38.9729	8.71232	6.40648	6.08336
Summer 2015	Banana	B9	A. eburneus	12	-19.3985	35.4558	8.75196	8.52998	4.15661
Spring 2015	IRL	IRL1	A. eburneus	7	-21.2709	36.2019	4.86911	9.05559	3.99774
Spring 2015	IRL	IRL1	A. eburneus	7	-20.9197	35.9746	5.67127	9.5681	3.75985
Spring 2015	IRL	IRL1	A. eburneus	7	-20.9116	36.2239	5.34126	9.36648	3.8674
Spring 2015	IRL	IRL1	A. eburneus	8	-20.9777	34.9106	5.2856	9.02801	3.86692
Spring 2015	IRL	IRL1	A. eburneus	7	-21.1528	36.1147	5.42078	9.23054	3.91252
Spring 2015	IRL	IRL1	A. eburneus	7	-20.9777	35.4839	5.31243	9.0269	3.9309
Spring 2015	IRL	IRL1	A. eburneus	6	-21.1834	33.6651	4.59079	8.66629	3.8846
Spring 2015	IRL	IRL1	A. eburneus	8	-20.8036	38.1783	5.50925	9.72452	3.92598
Spring 2015	IRL	IRL1	A. eburneus	5	-20.6357	35.992	5.78757	9.44224	3.81181
Spring 2015	IRL	IRL1	A. eburneus	7	-20.769	39.9904	5.72196	10.4523	3.82598
Fall 2015	IRL	IRL1	A. eburneus	11	-22.3241	34.9258	7.75832	9.01389	3.87467
Fall 2015	IRL	IRL1	A. eburneus	10	-22.2899	39.828	8.2596	10.5411	3.77834
Fall 2015	IRL	IRL1	A. eburneus	9	-21.948	34.8896	7.95753	8.34215	4.18233
Fall 2015	IRL	IRL1	A. eburneus	8	-22.1305	37.1836	7.72895	9.2963	3.99982
Fall 2015	IRL	IRL1	A. eburneus	9	-20.9327	33.1291	10.8177	9.14443	3.62287
Fall 2015	IRL	IRL1	A. eburneus	8	-21.2722	29.4775	7.35975	7.73796	3.80947
Fall 2015	IRL	IRL1	A. eburneus	8	-22.0059	40.1897	7.52506	10.345	3.88494
Fall 2015	IRL	IRL1	A. eburneus	8	-20.9631	36.1916	9.88216	9.23628	3.91842
Fall 2015	IRL	IRL1	A. eburneus	9	-21.5619	34.93	7.37079	8.94454	3.90517
Fall 2015	IRL	IRL1	A. eburneus	8	-21.9878	33.0677	7.9303	8.63652	3.82882
Winter 2015	IRL	IRL1	A. eburneus	4.2	-22.3657	16.0741	4.92489	4.04558	3.97326
Winter 2015	IRL	IRL1	A. eburneus	4.2	-22.6092	22.8655	5.73686	5.96329	3.83438
Winter 2015	IRL	IRL1	A. eburneus	4.2	-22.3728	31.8263	3.80534	8.09717	3.93055
Winter 2015	IRL	IRL1	A. eburneus	4.2	-22.2	34.6888	4.46798	8.90438	3.8957
Winter 2015	IRL	IRL1	A. eburneus	4.2	-22.1539	17.2292	3.95765	4.30217	4.00477
Winter 2015	IRL	IRL1	A. eburneus	4.2	-23.1902	30.3277	6.05235	7.37137	4.11426
Winter 2015	IRL	IRL1	A. eburneus	4.2	-22.1007	30.4034	4.19106	7.88702	3.85487
Winter 2015	IRL	IRL1	A. eburneus	4.2	-22.1355	20.8923	4.18117	5.47757	3.81416
Winter 2015	IRL	IRL1	A. eburneus	4.2	-22.3033	18.4961	4.52237	4.66515	3.96475
Winter 2015	IRL	IRL1	A. eburneus	4.2	-22.8751	24.4758	5.76356	6.09038	4.01877
Winter 2015	IRL	IRL1	A. eburneus	4.2	-22.2879	33.6412	4.81511	8.47684	3.9686
Summer 2015	IRL	IRL1	A. eburneus	12	-19.6882	37.3003	5.62765	9.39011	3.9723
Summer 2015	IRL	IRL1	A. eburneus	12	-19.5146	36.4854	5.41616	9.47981	3.84875
Summer 2015	IRL	IRL1	A. eburneus	11	-19.7666	37.2844	5.62905	9.10051	4.09696
Summer 2015	IRL	IRL1	A. eburneus	10	-19.3525	38.6643	5.44949	9.63423	4.01322
Summer 2015	IRL	IRL1	A. eburneus	11	-19.9236	37.7808	5.50631	9.50317	3.9756
Summer 2015	IRL	IRL1	A. eburneus	10	-20.0168	36.8049	5.66022	8.79406	4.18519
Summer 2015	IRL	IRL1	A. eburneus	9	-19.9486	34.8828	5.49995	8.77228	3.97648
Summer 2015	IRL	IRL1	A. eburneus	9	-19.5772	36.1855	5.65921	8.67483	4.17133
Summer 2015	IRL	IRL1	A. eburneus	6	-19.186	36.2005	5.53868	9.30826	3.88908
Summer 2015	IRL	IRL1	A. eburneus	7	-19.2841	35.7438	5.56757	9.33515	3.82895
Spring 2015	IRL	IRL10	A. eburneus	9	-20.5211	39.0684	11.3493	9.57773	4.07909
Spring 2015	IRL	IRL10	A. eburneus	12	-21.5902	37.1188	11.0588	9.54125	3.89035
Spring 2015	IRL	IRL10	A. eburneus	11	-21.3055	37.2668	11.3802	9.20394	4.04901
Spring 2015	IRL	IRL10	A. eburneus	13	-23.0422	41.2262	11.3742	9.86608	4.17858
Spring 2015	IRL	IRL10	A. eburneus	15	-21.5533	37.1567	10.8817	9.32314	3.98543
Spring 2015	IRL	IRL10	A. eburneus	13	-22.0684	39.5494	10.8797	10.1032	3.91453
Spring 2015	IRL	IRL10	A. eburneus	12	-24.0324	22.3015	13.001	4.99526	4.46453
Spring 2015	IRL	IRL10	A. eburneus	12	-24.1737	43.6678	11.3692	9.42465	4.63336
Spring 2015	IRL	IRL10	A. eburneus	11	-21.5984	39.5526	11.2916	9.85018	4.01542
Spring 2015	IRL	IRL10	A. eburneus	14	-22.2486	34.0182	11.2667	8.51813	3.99363
Fall 2015	IRL	IRL10	A. eburneus	9	-18.1626	36.4067	10.5504	9.57941	3.80052
Fall 2015	IRL	IRL10	A. eburneus	7	-19.3214	37.8961	9.50474	7.38011	5.13489
Fall 2015	IRL	IRL10	A. eburneus	9	-18.1673	34.6105	10.4055	8.79584	3.93487
Fall 2015	IRL	IRL10	A. eburneus	7	-18.6218	37.4732	10.5559	8.46792	4.42532
Fall 2015	IRL	IRL10	A. eburneus	8	-17.8873	35.6721	9.19694	8.70956	4.09575
Fall 2015	IRL	IRL10	A. eburneus	7	-19.2515	39.8848	10.0625	7.5092	5.31147
Fall 2015	IRL	IRL10	A. eburneus	8	-17.9918	36.9057	9.28987	7.51936	4.90809
Fall 2015	IRL	IRL10	A. eburneus	9	-17.5677	33.4017	10.2132	7.59304	4.39899
Fall 2015	IRL	IRL10	A. eburneus	7	-18.2948	35.9691	10.3276	9.37509	3.83666
Fall 2015	IRL	IRL10	A. eburneus	7	-18.6801	36.6702	10.1556	8.0282	4.56768
Winter 2015	IRL	IRL10	A. eburneus	9	-22.1891	32.6791	9.80728	7.77611	4.2025
Winter 2015	IRL	IRL10	A. eburneus	9	-24.3261	31.8084	8.54299	7.39771	4.29976
Winter 2015	IRL	IRL10	A. eburneus	9	-22.3943	31.6222	9.7912	7.77198	4.06875
Winter 2015	IRL	IRL10	A. eburneus	9	-22.2422	32.7262	9.99923	7.52356	4.34983
Winter 2015	IRL	IRL10	A. eburneus	9	-23.6308	34.9364	10.552	8.19016	4.26565
Winter 2015	IRL	IRL10	A. eburneus	9	-22.766	33.4436	9.86758	8.31019	4.02441
Winter 2015	IRL	IRL10	A. eburneus	9	-22.7119	31.0346	9.46055	7.86417	3.94633
Winter 2015	IRL	IRL10	A. eburneus	9	-23.5261	34.4725	9.60283	7.81118	4.41323
Winter 2015	IRL	IRL10	A. eburneus	9	-23.8742	32.0121	9.47921	7.84259	4.08183
Winter 2015	IRL	IRL10	A. eburneus	9	-23.1412	34.9112	9.95079	7.86383	4.43947
Winter 2015	IRL	IRL10	A. eburneus	9	-21.4892	31.1964	10.0914	7.28854	4.2802
Winter 2015	IRL	IRL10	A. eburneus	9	-23.0687	33.2074	9.4144	7.61919	4.35839
Winter 2016-Bloom	IRL	IRL10	A. eburneus	7	-20.0448	41.3766	13.1928	10.3724	3.98909
Winter 2016-Bloom	IRL	IRL10	A. eburneus	8	-19.8566	39.7072	12.9362	9.58395	4.14309
Winter 2016-Bloom	IRL	IRL10	A. eburneus	8	-20.0334	40.9232	12.753	10.1351	4.03775
Winter 2016-Bloom	IRL	IRL10	A. eburneus	9	-20.4999	41.1842	12.7575	9.83922	4.18572
Winter 2016-Bloom	IRL	IRL10	A. eburneus	9	-20.4097	40.9825	12.7128	10.0999	4.0577
Winter 2016-Bloom	IRL	IRL10	A. eburneus	7	-19.9469	40.1041	13.4591	10.35	3.87479
Winter 2016-Bloom	IRL	IRL10	A. eburneus	9	-20.7038	39.3263	12.5647	9.03971	4.35039
Winter 2016-Bloom	IRL	IRL10	A. eburneus	8	-20.3103	38.1965	12.5849	9.62565	3.9682
Winter 2016-Bloom	IRL	IRL10	A. eburneus	7	-20.1818	40.7657	12.7863	10.4956	3.88406
Winter 2016-Bloom	IRL	IRL10	A. eburneus	8	-20.3092	39.8118	13.0329	9.01999	4.41373
Winter 2016-Bloom	IRL	IRL10	A. eburneus	7	-19.5162	39.3568	12.9703	9.62529	4.0889
Summer 2015	IRL	IRL10	A. eburneus	11	-17.8774	32.9588	9.92173	7.89879	4.17264
Summer 2015	IRL	IRL10	A. eburneus	8	-19.3328	34.8072	9.57632	7.86507	4.42555
Summer 2015	IRL	IRL10	A. eburneus	7	-19.2904	32.5223	9.70987	8.43129	3.85734
Summer 2015	IRL	IRL10	A. eburneus	8	-18.7716	32.8924	9.29954	8.47306	3.88199
Summer 2015	IRL	IRL10	A. eburneus	10	-17.7147	32.9303	10.1829	8.44673	3.89859
Summer 2015	IRL	IRL10	A. eburneus	10	-18.2862	35.0286	10.0003	6.3933	5.47895
Summer 2015	IRL	IRL10	A. eburneus	12	-18.0309	19.0836	10.7698	4.4786	4.26106
Summer 2015	IRL	IRL10	A. eburneus	11	-20.1923	34.3566	9.30284	7.63625	4.49915
Summer 2015	IRL	IRL10	A. eburneus	6	-19.2008	33.0653	9.41196	8.60957	3.84053
Summer 2015	IRL	IRL10	A. eburneus	7	-19.4413	34.4837	9.78087	7.63204	4.51828
Spring 2015	IRL	IRL11	A. eburneus	5	-19.296	43.2896	9.671	8.2075	5.2744
Spring 2015	IRL	IRL11	A. eburneus	12	-18.7032	41.5063	9.044	9.61773	4.3156
Spring 2015	IRL	IRL11	A. eburneus	4	-19.1192	40.0959	9.637	8.35885	4.79682
Spring 2015	IRL	IRL11	A. eburneus	5	-19.2035	44.2832	9.194	7.66916	5.7742
Spring 2015	IRL	IRL11	A. eburneus	10	-19.2794	40.2396	9.444	8.39446	4.79359
Spring 2015	IRL	IRL11	A. eburneus	4	-18.6668	37.6412	9.312	9.33536	4.03211
Spring 2015	IRL	IRL11	A. eburneus	5	-19.0381	40.2822	9.852	9.47118	4.25314
Spring 2015	IRL	IRL11	A. eburneus	8	-19.2451	44.7586	8.712	8.5575	5.23034
Spring 2015	IRL	IRL11	A. eburneus	6	-18.3611	38.6344	8.592	8.84858	4.36617
Spring 2015	IRL	IRL11	A. eburneus	5	-18.75	40.4407	9.481	9.79427	4.12902
Fall 2015	IRL	IRL11	A. eburneus	7	-18.824	40.9013	10.1135	9.48409	4.31262
Fall 2015	IRL	IRL11	A. eburneus	6	-18.9492	37.0977	9.75398	8.76489	4.23254
Fall 2015	IRL	IRL11	A. eburneus	8	-19.3443	38.5553	9.30558	8.87946	4.34207
Fall 2015	IRL	IRL11	A. eburneus	8	-19.3875	38.5226	10.0276	9.09399	4.23605
Fall 2015	IRL	IRL11	A. eburneus	7	-19.6129	41.9056	9.84041	8.85569	4.73206
Fall 2015	IRL	IRL11	A. eburneus	9	-19.0648	36.6651	9.83056	8.69212	4.2182
Fall 2015	IRL	IRL11	A. eburneus	7	-19.2904	36.5084	10.3793	9.03217	4.04204
Fall 2015	IRL	IRL11	A. eburneus	8	-19.1327	37.9781	10.3411	9.42534	4.02936
Fall 2015	IRL	IRL11	A. eburneus	10	-19.2471	36.7484	9.71811	8.79943	4.17622
Fall 2015	IRL	IRL11	A. eburneus	8	-18.9104	37.8917	9.89354	8.96465	4.22679
Winter 2015	IRL	IRL11	A. eburneus	9.2	-24.2834	31.0763	7.74624	7.67026	4.05154
Winter 2015	IRL	IRL11	A. eburneus	9.2	-24.3466	27.5672	8.08223	6.49492	4.24443
Winter 2015	IRL	IRL11	A. eburneus	9.2	-24.2355	32.7099	8.25372	8.58437	3.8104
Winter 2015	IRL	IRL11	A. eburneus	9.2	-24.292	36.171	8.16034	9.31359	3.88368
Winter 2015	IRL	IRL11	A. eburneus	9.2	-24.9539	39.3453	7.97102	8.59221	4.57918
Winter 2015	IRL	IRL11	A. eburneus	9.2	-23.9911	35.4426	8.35771	9.11545	3.8882
Winter 2015	IRL	IRL11	A. eburneus	9.2	-23.9707	35.2148	8.06266	9.0933	3.87262
Winter 2015	IRL	IRL11	A. eburneus	9.2	-23.9849	31.5503	8.47553	8.21217	3.8419
Winter 2015	IRL	IRL11	A. eburneus	9.2	-25.3681	33.0369	8.11603	8.28306	3.98849
Winter 2015	IRL	IRL11	A. eburneus	9.2	-23.5178	36.0135	8.84208	8.95662	4.02088
Winter 2015	IRL	IRL11	A. eburneus	9.2	-23.7238	36.9081	8.55005	8.80964	4.18952
Winter 2015	IRL	IRL11	A. eburneus	9.2	-25.0151	37.701	7.91866	8.35436	4.51273
Summer 2015	IRL	IRL11	A. eburneus	10	-19.6466	33.6283	9.67916	7.97038	4.21916
Summer 2015	IRL	IRL11	A. eburneus	8	-19.4875	33.0357	10.0534	7.94467	4.15822
Summer 2015	IRL	IRL11	A. eburneus	8	-19.9151	34.2062	10.3259	8.11893	4.21314
Summer 2015	IRL	IRL11	A. eburneus	7	-18.8284	36.1021	10.0095	8.86764	4.07122
Summer 2015	IRL	IRL11	A. eburneus	9	-19.6003	35.7586	9.42768	8.42103	4.24634
Summer 2015	IRL	IRL11	A. eburneus	8	-18.844	34.2964	9.87284	8.45129	4.05813
Summer 2015	IRL	IRL11	A. eburneus	11	-19.5716	37.5025	10.0043	9.18764	4.08184
Summer 2015	IRL	IRL11	A. eburneus	9	-19.0715	32.6455	9.94418	8.34163	3.91356
Summer 2015	IRL	IRL11	A. eburneus	9	-18.9287	35.5476	10.067	9.28941	3.82668
Summer 2015	IRL	IRL11	A. eburneus	7	-18.8362	36.7709	10.4028	9.4126	3.90657
Spring 2015	IRL	IRL12	A. eburneus	7	-20.6499	36.9038	10.6353	9.94245	3.71174
Spring 2015	IRL	IRL12	A. eburneus	8	-21.9458	36.1315	10.5538	9.30999	3.88093
Spring 2015	IRL	IRL12	A. eburneus	5	-20.1837	37.193	10.1403	9.41224	3.95156
Spring 2015	IRL	IRL12	A. eburneus	7	-20.3618	36.4785	10.5409	9.56225	3.81484
Spring 2015	IRL	IRL12	A. eburneus	7	-20.5359	36.0061	10.8053	9.72234	3.70344
Spring 2015	IRL	IRL12	A. eburneus	8	-20.5206	37.008	10.525	9.71335	3.81001
Spring 2015	IRL	IRL12	A. eburneus	6	-20.5186	36.0352	9.94447	9.00118	4.00339
Spring 2015	IRL	IRL12	A. eburneus	7	-20.0778	36.8541	10.3818	9.46316	3.89448
Spring 2015	IRL	IRL12	A. eburneus	8	-21.0296	36.101	10.2765	9.20253	3.92295
Spring 2015	IRL	IRL12	A. eburneus	6	-20.654	38.3412	10.017	9.82562	3.90216
Fall 2015	IRL	IRL12	A. eburneus	6	-19.6915	35.2154	9.93149	9.16267	3.84335
Fall 2015	IRL	IRL12	A. eburneus	4	-18.8189	32.5505	10.8073	8.63484	3.76966
Fall 2015	IRL	IRL12	A. eburneus	6	-20.1664	31.3028	10.2944	7.14103	4.38352
Fall 2015	IRL	IRL12	A. eburneus	5	-19.5386	33.5446	10.9817	8.13403	4.12398
Fall 2015	IRL	IRL12	A. eburneus	5	-20.248	27.3561	9.84008	5.88873	4.64551
Fall 2015	IRL	IRL12	A. eburneus	5	-19.4746	36.6552	10.0352	7.99256	4.58617
Fall 2015	IRL	IRL12	A. eburneus	5	-20.0255	36.007	9.88677	8.41318	4.27983
Fall 2015	IRL	IRL12	A. eburneus	5	-20.1335	33.0476	9.57446	8.13903	4.06038
Fall 2015	IRL	IRL12	A. eburneus	4	-19.9007	36.0985	10.1084	8.77797	4.1124
Winter 2015	IRL	IRL12	A. eburneus	8	-23.5534	34.2867	10.2329	8.9571	3.82788
Winter 2015	IRL	IRL12	A. eburneus	8	-23.3559	36.559	9.91934	9.28655	3.93676
Winter 2015	IRL	IRL12	A. eburneus	8	-23.4081	34.8305	9.69978	8.07796	4.3118
Winter 2015	IRL	IRL12	A. eburneus	8	-22.8363	37.6405	10.6176	9.36419	4.01962
Winter 2015	IRL	IRL12	A. eburneus	8	-23.716	37.6305	10.7501	9.79841	3.84046
Winter 2015	IRL	IRL12	A. eburneus	8	-22.9999	29.6864	10.1102	7.5741	3.91946
Winter 2015	IRL	IRL12	A. eburneus	8	-23.0204	35.3489	10.2962	9.38457	3.7667
Winter 2015	IRL	IRL12	A. eburneus	8	-23.1575	33.9532	9.6533	9.09239	3.73424
Winter 2015	IRL	IRL12	A. eburneus	8	-23.0511	35.3052	10.1755	9.24593	3.81846
Winter 2015	IRL	IRL12	A. eburneus	8	-23.1288	28.627	8.67221	7.60401	3.76472
Winter 2015	IRL	IRL12	A. eburneus	8	-22.9478	31.7923	10.0618	8.03772	3.95539
Winter 2015	IRL	IRL12	A. eburneus	8	-23.446	31.9296	10.0291	8.2306	3.87938
Winter 2016-Bloom	IRL	IRL12	A. eburneus	7	-19.989	38.3348	11.323	9.7654	3.92558
Winter 2016-Bloom	IRL	IRL12	A. eburneus	6	-19.5911	41.1033	10.7158	10.3673	3.96472
Winter 2016-Bloom	IRL	IRL12	A. eburneus	7	-20.1988	38.2929	11.7485	9.52005	4.02234
Winter 2016-Bloom	IRL	IRL12	A. eburneus	5	-20.1999	39.9968	11.1225	10.0684	3.97251
Winter 2016-Bloom	IRL	IRL12	A. eburneus	5	-19.9836	40.1932	11.9376	10.5446	3.81174
Winter 2016-Bloom	IRL	IRL12	A. eburneus	8	-19.9825	38.9807	11.4072	8.9413	4.35962
Winter 2016-Bloom	IRL	IRL12	A. eburneus	6	-20.1174	40.4864	11.291	10.0951	4.01051
Winter 2016-Bloom	IRL	IRL12	A. eburneus	8	-20.0695	39.3804	11.4486	9.72695	4.04859
Winter 2016-Bloom	IRL	IRL12	A. eburneus	5	-20.1079	40.9564	11.5438	10.2491	3.99611
Winter 2016-Bloom	IRL	IRL12	A. eburneus	9	-20.1556	40.281	11.3288	9.93841	4.05307
Summer 2015	IRL	IRL12	A. eburneus	12	-18.7749	36.5986	10.1944	8.4043	4.35475
Summer 2015	IRL	IRL12	A. eburneus	13	-18.8349	36.0626	10.3026	8.53669	4.22442
Summer 2015	IRL	IRL12	A. eburneus	11	-18.5318	35.795	10.2518	8.69301	4.11768
Summer 2015	IRL	IRL12	A. eburneus	11	-19.32	38.0908	10.34	8.33647	4.56917
Summer 2015	IRL	IRL12	A. eburneus	11	-18.8315	34.5429	9.96026	8.16967	4.22819
Summer 2015	IRL	IRL12	A. eburneus	9	-18.6801	34.4506	9.82954	8.28618	4.15759
Summer 2015	IRL	IRL12	A. eburneus	10	-18.8495	25.2215	11.0036	5.93583	4.24902
Summer 2015	IRL	IRL12	A. eburneus	10	-18.9184	29.4619	10.3903	7.39209	3.9856
Summer 2015	IRL	IRL12	A. eburneus	4	-19.5298	34.5129	9.32577	7.61191	4.53407
Summer 2015	IRL	IRL12	A. eburneus	5	-18.9074	34.5002	9.59832	8.68317	3.97322
Winter 2015	IRL	IRL13 M	A. eburneus	6	-23.1534	35.9892	9.20702	8.84928	4.0669
Winter 2015	IRL	IRL13 M	A. eburneus	6	-22.6776	32.1683	10.3107	7.70281	4.17618
Winter 2015	IRL	IRL13 M	A. eburneus	6	-23.1003	30.8858	9.35358	7.48976	4.12374
Winter 2015	IRL	IRL13 M	A. eburneus	6	-23.3015	34.5422	9.69655	7.9909	4.32269
Winter 2015	IRL	IRL13 M	A. eburneus	6	-23.1197	33.1624	10.0186	8.05465	4.11717
Winter 2015	IRL	IRL13 M	A. eburneus	6	-21.8945	34.7152	10.5639	8.54002	4.065
Winter 2015	IRL	IRL13 M	A. eburneus	6	-22.5092	33.7633	10.1023	8.26978	4.08273
Winter 2015	IRL	IRL13 M	A. eburneus	6	-23.1361	32.0718	9.93583	7.88957	4.06509
Winter 2015	IRL	IRL13 M	A. eburneus	6	-23.5924	40.9683	10.0934	9.66264	4.23986
Winter 2015	IRL	IRL13 M	A. eburneus	6	-23.0352	29.9848	10.1836	7.18647	4.17239
Winter 2015	IRL	IRL13 M	A. eburneus	6	-23.1197	37.4281	9.74306	9.32641	4.01313
Winter 2015	IRL	IRL13 M	A. eburneus	6	-21.8086	37.4555	10.794	9.30638	4.02471
Fall 2015	IRL	IRL13D	A. eburneus	8	-21.4584	32.595	9.44176	5.58484	5.83633
Fall 2015	IRL	IRL13D	A. eburneus	6	-18.8764	32.443	10.3986	6.84984	4.73632
Fall 2015	IRL	IRL13D	A. eburneus	8	-20.3254	36.7278	10.4207	7.48714	4.90545
Fall 2015	IRL	IRL13D	A. eburneus	5	-20.0806	22.5532	9.72134	3.73164	6.04378
Fall 2015	IRL	IRL13D	A. eburneus	5	-19.9203	38.5295	10.0123	8.85615	4.35059
Fall 2015	IRL	IRL13D	A. eburneus	6	-20.2846	32.1457	10.6074	6.34574	5.06571
Fall 2015	IRL	IRL13D	A. eburneus	5	-19.9228	33.076	10.1642	7.95243	4.15923
Fall 2015	IRL	IRL13D	A. eburneus	7	-18.8632	35.2149	9.93261	8.74494	4.02689
Fall 2015	IRL	IRL13D	A. eburneus	6	-19.5272	34.4459	10.1888	8.33386	4.13325
Fall 2015	IRL	IRL13D	A. eburneus	8	-19.7204	39.4599	9.93676	7.71981	5.11151
Winter 2015	IRL	IRL13d	A. eburneus	7.4	-23.3689	33.9408	10.3717	8.24776	4.11515
Winter 2015	IRL	IRL13d	A. eburneus	7.4	-22.9649	35.3942	10.4543	8.6776	4.0788
Winter 2015	IRL	IRL13d	A. eburneus	7.4	-23.1812	32.5966	10.6074	8.31399	3.92069
Winter 2015	IRL	IRL13d	A. eburneus	7.4	-21.7154	30.6771	10.3063	7.60634	4.03309
Winter 2015	IRL	IRL13d	A. eburneus	7.4	-21.9113	29.2482	10.4563	6.77444	4.31744
Winter 2015	IRL	IRL13d	A. eburneus	7.4	-23.5657	25.1407	9.22071	6.03031	4.16906
Winter 2015	IRL	IRL13d	A. eburneus	7.4	-25.2599	36.5041	9.69702	8.87345	4.11386
Winter 2015	IRL	IRL13d	A. eburneus	7.4	-21.8735	37.5981	10.8349	9.17952	4.09587
Winter 2015	IRL	IRL13d	A. eburneus	7.4	-22.5845	37.3752	10.8319	9.46134	3.95031
Winter 2015	IRL	IRL13d	A. eburneus	7.4	-23.1057	37.0458	10.8279	8.92481	4.15088
Winter 2015	IRL	IRL13d	A. eburneus	7.4	-22.1908	31.6287	10.7514	7.49057	4.22247
Winter 2015	IRL	IRL13d	A. eburneus	7.4	-22.5029	35.1766	10.6285	8.82882	3.9843
Winter 2016-Bloom	IRL	IRL13D	A. eburneus	9	-19.649	38.5614	11.1223	9.44173	4.08415
Winter 2016-Bloom	IRL	IRL13D	A. eburneus	7	-19.3286	39.9411	11.526	9.23116	4.32677
Winter 2016-Bloom	IRL	IRL13D	A. eburneus	10	-21.0088	30.512	11.2803	5.94732	5.13038
Winter 2016-Bloom	IRL	IRL13D	A. eburneus	6	-19.6316	38.337	10.4669	10.1867	3.76344
Winter 2016-Bloom	IRL	IRL13D	A. eburneus	9	-19.5988	40.6599	10.5955	10.2699	3.95914
Winter 2016-Bloom	IRL	IRL13D	A. eburneus	7	-19.9662	40.6938	10.6731	9.96259	4.08466
Winter 2016-Bloom	IRL	IRL13D	A. eburneus	6	-19.7093	38.3286	11.0955	9.36258	4.09381
Winter 2016-Bloom	IRL	IRL13D	A. eburneus	6	-19.3542	40.6563	10.7633	10.3963	3.91065
Winter 2016-Bloom	IRL	IRL13D	A. eburneus	5	-19.2449	38.1247	11.4138	10.217	3.7315
Winter 2016-Bloom	IRL	IRL13D	A. eburneus	6	-20.082	37.1901	10.9159	8.8944	4.18129
Summer 2015	IRL	IRL13D	A. eburneus	6	-20.117	36.7251	10.4493	7.11112	5.16446
Summer 2015	IRL	IRL13D	A. eburneus	6	-20.242	37.8171	10.7376	7.55342	5.00661
Summer 2015	IRL	IRL13D	A. eburneus	12	-18.869	35.0343	10.2524	8.89011	3.94082
Summer 2015	IRL	IRL13D	A. eburneus	14	-20.1432	31.1884	10.5335	6.15718	5.06536
Summer 2015	IRL	IRL13D	A. eburneus	6	-20.2785	38.8036	10.5455	7.21572	5.37764
Summer 2015	IRL	IRL13D	A. eburneus	8	-20.2358	31.2406	9.90648	5.74798	5.43506
Summer 2015	IRL	IRL13D	A. eburneus	5	-19.5355	30.9105	9.39591	7.34836	4.20644
Summer 2015	IRL	IRL13D	A. eburneus	5	-19.3437	32.5028	9.65724	8.30437	3.91394
Summer 2015	IRL	IRL13D	A. eburneus	6	-20.1155	31.4853	10.2803	6.22755	5.05581
Summer 2015	IRL	IRL13D	A. eburneus	7	-20.1982	33.3585	10.6526	6.05032	5.51351
Fall 2015	IRL	IRL13M	A. eburneus	5	-19.2109	32.315	10.7892	8.06848	4.0051
Fall 2015	IRL	IRL13M	A. eburneus	5	-19.36	33.5235	10.456	8.77344	3.82102
Fall 2015	IRL	IRL13M	A. eburneus	6	-20.0185	36.6286	9.69842	8.88021	4.12475
Fall 2015	IRL	IRL13M	A. eburneus	6	-19.5995	35.7559	10.4919	8.55209	4.18096
Fall 2015	IRL	IRL13M	A. eburneus	5	-19.3823	35.2852	9.97019	9.2075	3.83223
Fall 2015	IRL	IRL13M	A. eburneus	5	-19.7008	34.0436	10.0098	9.16074	3.71625
Fall 2015	IRL	IRL13M	A. eburneus	6	-19.1032	33.3422	10.3913	8.75172	3.80979
Fall 2015	IRL	IRL13M	A. eburneus	5	-20.5456	35.7661	9.85985	8.10632	4.41212
Fall 2015	IRL	IRL13M	A. eburneus	6	-19.1277	35.8365	10.6695	8.88271	4.03441
Fall 2015	IRL	IRL13M	A. eburneus	6	-18.96	34.9696	11.0058	8.92422	3.91851
Spring 2015	IRL	IRL2	A. eburneus	12	-21.0848	31.1015	5.32569	7.48681	4.15417
Spring 2015	IRL	IRL2	A. eburneus	10	-20.7721	32.0186	7.12887	8.28234	3.86589
Spring 2015	IRL	IRL2	A. eburneus	11	-20.1323	37.7286	5.84576	9.27742	4.06671
Spring 2015	IRL	IRL2	A. eburneus	7	-20.4904	31.2278	5.63291	7.12654	4.38191
Spring 2015	IRL	IRL2	A. eburneus	12	-20.7371	37.6668	5.71926	9.50134	3.96436
Spring 2015	IRL	IRL2	A. eburneus	10	-20.7267	36.8985	5.44416	9.33975	3.9507
Spring 2015	IRL	IRL2	A. eburneus	11	-20.9837	37.1335	5.97528	8.96434	4.14236
Spring 2015	IRL	IRL2	A. eburneus	10	-21.5688	28.858	6.4843	5.47325	5.27256
Spring 2015	IRL	IRL2	A. eburneus	11	-20.6163	33.3305	7.18811	8.2552	4.03752
Spring 2015	IRL	IRL2	A. eburneus	10	-20.0885	28.0559	6.42396	7.39842	3.79215
Fall 2015	IRL	IRL2	A. eburneus	9	-18.6068	34.3658	6.5165	8.40882	4.08687
Fall 2015	IRL	IRL2	A. eburneus	6	-20.4217	29.5756	7.49025	6.20234	4.76846
Fall 2015	IRL	IRL2	A. eburneus	9	-19.6611	34.2602	6.83464	8.16785	4.19453
Winter 2015	IRL	IRL2	A. eburneus	8.6	-21.1418	34.7075	7.76205	8.25876	4.20251
Winter 2015	IRL	IRL2	A. eburneus	8.6	-20.7702	34.9048	7.04377	7.49439	4.65745
Winter 2015	IRL	IRL2	A. eburneus	8.6	-20.6867	32.6971	7.07174	7.97638	4.09924
Winter 2015	IRL	IRL2	A. eburneus	8.6	-20.9758	32.6174	7.33747	7.99091	4.08181
Winter 2015	IRL	IRL2	A. eburneus	8.6	-21.2537	34.7343	7.5083	8.70828	3.98865
Winter 2015	IRL	IRL2	A. eburneus	8.6	-20.7671	31.8826	7.15965	6.85953	4.64793
Winter 2015	IRL	IRL2	A. eburneus	8.6	-20.9351	34.0543	6.79501	8.69954	3.9145
Winter 2015	IRL	IRL2	A. eburneus	8.6	-21.0563	31.9867	7.46035	8.17822	3.91121
Winter 2015	IRL	IRL2	A. eburneus	8.6	-21.1224	35.0878	7.18762	8.68177	4.04155
Winter 2015	IRL	IRL2	A. eburneus	8.6	-21.2018	33.3645	6.91789	6.90742	4.83023
Winter 2015	IRL	IRL2	A. eburneus	8.6	-20.6155	33.5373	7.09671	8.09453	4.1432
Winter 2015	IRL	IRL2	A. eburneus	8.6	-21.0379	36.6009	7.31849	8.72618	4.19438
Summer 2015	IRL	IRL2	A. eburneus	8	-15.6516	32.8702	8.08394	7.51173	4.37585
Summer 2015	IRL	IRL2	A. eburneus	10	-15.6066	40.3717	7.74103	8.704	4.63829
Summer 2015	IRL	IRL2	A. eburneus	10	-15.7218	44.4429	8.05702	8.92426	4.98001
Summer 2015	IRL	IRL2	A. eburneus	9	-15.3696	42.246	8.67078	9.09964	4.6426
Summer 2015	IRL	IRL2	A. eburneus	10	-15.5903	46.5981	7.97806	9.69142	4.80818
Summer 2015	IRL	IRL2	A. eburneus	6	-15.7793	43.6152	8.1469	8.73056	4.99569
Summer 2015	IRL	IRL2	A. eburneus	11	-17.4418	41.3316	8.17984	10.5818	3.90591
Summer 2015	IRL	IRL2	A. eburneus	7	-15.2473	41.8534	8.44896	9.21959	4.53962
Summer 2015	IRL	IRL2	A. eburneus	5	-15.3624	45.0243	8.37773	10.018	4.49435
Summer 2015	IRL	IRL2	A. eburneus	6	-15.6555	43.3225	8.29002	9.10598	4.75759
Spring 2015	IRL	IRL3	A. eburneus	9	-19.5697	35.7328	6.63079	8.85491	4.03536
Spring 2015	IRL	IRL3	A. eburneus	7	-19.5831	35.1447	6.89833	9.39371	3.7413
Spring 2015	IRL	IRL3	A. eburneus	10	-19.4859	36.8934	6.69292	9.54471	3.86533
Spring 2015	IRL	IRL3	A. eburneus	10	-19.6555	41.8253	6.96847	10.1954	4.10238
Spring 2015	IRL	IRL3	A. eburneus	8	-19.4466	38.0805	6.48951	9.74825	3.9064
Spring 2015	IRL	IRL3	A. eburneus	7	-19.4125	37.6753	6.1318	9.70067	3.88378
Spring 2015	IRL	IRL3	A. eburneus	11	-18.9234	33.8319	6.31817	8.72531	3.87744
Spring 2015	IRL	IRL3	A. eburneus	7	-19.5397	34.7431	6.31116	8.7611	3.96561
Spring 2015	IRL	IRL3	A. eburneus	7	-19.6886	34.3568	6.12278	8.52887	4.0283
Spring 2015	IRL	IRL3	A. eburneus	7	-19.7972	38.0635	6.09973	9.75255	3.90293
Fall 2015	IRL	IRL3	A. eburneus	10	-19.728	32.1123	5.89912	7.95732	4.03557
Fall 2015	IRL	IRL3	A. eburneus	9	-20.0865	33.4603	6.00808	8.34034	4.01186
Fall 2015	IRL	IRL3	A. eburneus	8	-20.7631	29.934	4.30081	7.57777	3.95024
Fall 2015	IRL	IRL3	A. eburneus	8	-19.0342	34.0493	6.54643	7.99843	4.257
Fall 2015	IRL	IRL3	A. eburneus	8	-21.3262	38.0456	5.11631	9.0196	4.2181
Fall 2015	IRL	IRL3	A. eburneus	7	-20.9722	34.8169	5.71829	8.63855	4.03041
Fall 2015	IRL	IRL3	A. eburneus	6	-20.7241	35.4362	4.72653	8.64734	4.09793
Fall 2015	IRL	IRL3	A. eburneus	6	-21.3302	32.3029	5.1343	8.14807	3.96448
Fall 2015	IRL	IRL3	A. eburneus	6	-21.3267	34.0636	5.84844	8.84808	3.84983
Fall 2015	IRL	IRL3	A. eburneus	11	-18.7477	31.3268	6.43633	7.50871	4.17207
Winter 2015	IRL	IRL3	A. eburneus	8.2	-21.9012	33.8574	6.10687	7.78855	4.34707
Winter 2015	IRL	IRL3	A. eburneus	8.2	-20.3033	27.2008	6.59329	6.06681	4.48355
Winter 2015	IRL	IRL3	A. eburneus	8.2	-21.4571	29.2094	6.85459	6.44324	4.53334
Winter 2015	IRL	IRL3	A. eburneus	8.2	-22.3811	36.1518	6.4757	7.26766	4.97434
Winter 2015	IRL	IRL3	A. eburneus	8.2	-20.9731	28.2132	6.01139	7.19045	3.9237
Winter 2015	IRL	IRL3	A. eburneus	8.2	-21.1681	34.3644	7.09378	8.64017	3.97728
Winter 2015	IRL	IRL3	A. eburneus	8.2	-21.4805	31.6778	6.26968	7.12697	4.44478
Winter 2015	IRL	IRL3	A. eburneus	8.2	-21.4571	28.8945	5.69984	6.31265	4.57723
Winter 2015	IRL	IRL3	A. eburneus	8.2	-21.0977	30.5519	6.33701	7.43927	4.10683
Winter 2015	IRL	IRL3	A. eburneus	8.2	-22.3627	31.2735	6.53902	5.07829	6.15828
Winter 2015	IRL	IRL3	A. eburneus	8.2	-22.425	38.3645	5.98627	7.14575	5.36886
Winter 2015	IRL	IRL3	A. eburneus	8.2	-21.842	31.3242	6.16817	7.45679	4.20076
Summer 2015	IRL	IRL3	A. eburneus	10	-15.643	32.5616	8.71807	8.48028	3.83968
Summer 2015	IRL	IRL3	A. eburneus	11	-15.6118	34.1388	8.11966	8.28711	4.1195
Summer 2015	IRL	IRL3	A. eburneus	10	-16.1202	36.8664	8.07363	8.34198	4.41938
Summer 2015	IRL	IRL3	A. eburneus	11	-16.0646	34.2577	7.74339	7.00723	4.88891
Summer 2015	IRL	IRL3	A. eburneus	10	-15.7701	35.1501	8.47974	8.2581	4.25644
Summer 2015	IRL	IRL3	A. eburneus	8	-16.0587	29.6749	7.96868	7.07659	4.19339
Summer 2015	IRL	IRL3	A. eburneus	10	-16.0231	37.1093	8.4727	7.35352	5.04647
Summer 2015	IRL	IRL3	A. eburneus	10	-15.4951	33.5488	8.37781	8.51427	3.9403
Summer 2015	IRL	IRL3	A. eburneus	8	-15.8129	34.3168	8.41628	8.65442	3.96523
Summer 2015	IRL	IRL3	A. eburneus	9	-15.4827	33.6365	8.82443	8.84206	3.80415
Spring 2015	IRL	IRL4	A. eburneus	14	-20.7784	33.5552	7.85524	8.64279	3.88245
Spring 2015	IRL	IRL4	A. eburneus	12	-21.4019	36.1766	7.59572	8.84354	4.09074
Spring 2015	IRL	IRL4	A. eburneus	10	-20.5334	35.9198	7.40033	9.01975	3.98235
Spring 2015	IRL	IRL4	A. eburneus	11	-20.1777	33.6057	7.45945	8.15963	4.11853
Spring 2015	IRL	IRL4	A. eburneus	16	-20.2749	27.185	8.36526	7.10861	3.82423
Spring 2015	IRL	IRL4	A. eburneus	8	-20.4972	38.4394	6.88129	8.88464	4.3265
Spring 2015	IRL	IRL4	A. eburneus	10	-20.5313	36.8358	7.38931	9.05361	4.06864
Spring 2015	IRL	IRL4	A. eburneus	9	-20.6895	35.2079	7.8873	8.95327	3.93241
Spring 2015	IRL	IRL4	A. eburneus	10	-20.8394	36.7266	7.3853	9.17778	4.00169
Spring 2015	IRL	IRL4	A. eburneus	9	-20.2707	33.9224	7.24302	8.51711	3.98285
Fall 2015	IRL	IRL4	A. eburneus	7	-21.0369	29.9386	6.83462	7.85758	3.81015
Fall 2015	IRL	IRL4	A. eburneus	8	-21.2003	33.3765	6.53068	8.74281	3.8176
Fall 2015	IRL	IRL4	A. eburneus	8	-21.6287	36.2094	6.74071	9.35698	3.86977
Fall 2015	IRL	IRL4	A. eburneus	5	-21.6826	34.8196	6.55155	7.89279	4.41157
Fall 2015	IRL	IRL4	A. eburneus	6	-21.8047	34.3256	6.99129	8.58583	3.99793
Fall 2015	IRL	IRL4	A. eburneus	4	-21.4354	33.61	6.61315	8.49673	3.95564
Fall 2015	IRL	IRL4	A. eburneus	8	-21.5081	24.2217	7.13361	6.10814	3.96548
Fall 2015	IRL	IRL4	A. eburneus	4	-22.6971	33.9282	8.66514	8.31741	4.07918
Fall 2015	IRL	IRL4	A. eburneus	7	-21.5784	36.489	6.99077	9.22715	3.95453
Fall 2015	IRL	IRL4	A. eburneus	7	-21.4197	32.9326	7.58987	8.383	3.92849
Winter 2015	IRL	IRL4	A. eburneus	8.6	-21.6508	34.6347	6.86694	8.00962	4.32414
Winter 2015	IRL	IRL4	A. eburneus	8.6	-23.0383	39.0732	6.68213	6.11774	6.38687
Winter 2015	IRL	IRL4	A. eburneus	8.6	-22.7166	38.8449	7.07373	9.15129	4.24475
Winter 2015	IRL	IRL4	A. eburneus	8.6	-21.9368	26.5329	6.57523	6.43302	4.12448
Winter 2015	IRL	IRL4	A. eburneus	8.6	-23.4883	37.7253	6.81	8.75595	4.30853
Winter 2015	IRL	IRL4	A. eburneus	8.6	-17.6989	16.4659	6.14566	2.96801	5.54778
Winter 2015	IRL	IRL4	A. eburneus	8.6	-21.3179	32.6717	7.22358	7.92024	4.12509
Winter 2015	IRL	IRL4	A. eburneus	8.6	-22.9436	34.8956	6.97483	8.92395	3.91033
Winter 2015	IRL	IRL4	A. eburneus	8.6	-20.2765	31.7252	7.46834	7.32247	4.33258
Winter 2015	IRL	IRL4	A. eburneus	8.6	-20.3202	32.2502	8.55026	7.29355	4.42174
Winter 2015	IRL	IRL4	A. eburneus	8.6	-21.9541	32.9614	6.22558	8.37145	3.93736
Winter 2015	IRL	IRL4	A. eburneus	8.6	-22.3257	37.8508	7.27254	8.91653	4.24501
Spring 2015	IRL	IRL5	A. eburneus	8	-22.0999	36.5802	7.364	9.21928	3.96779
Spring 2015	IRL	IRL5	A. eburneus	7	-21.8672	36.9316	7.307	9.07508	4.06957
Spring 2015	IRL	IRL5	A. eburneus	7	-21.9451	36.1815	7.362	9.15433	3.9524
Spring 2015	IRL	IRL5	A. eburneus	10	-22.1184	35.327	7.204	8.59818	4.10867
Spring 2015	IRL	IRL5	A. eburneus	7	-22.6565	38.5851	6.759	8.75921	4.40509
Spring 2015	IRL	IRL5	A. eburneus	8	-22.2844	36.4528	7.092	9.02798	4.03776
Spring 2015	IRL	IRL5	A. eburneus	9	-21.8949	35.2552	7.501	8.8687	3.97523
Spring 2015	IRL	IRL5	A. eburneus	7	-21.7811	35.7641	7.486	9.43708	3.78974
Spring 2015	IRL	IRL5	A. eburneus	8	-21.9431	39.1657	7.353	9.65482	4.0566
Spring 2015	IRL	IRL5	A. eburneus	8	-21.5414	36.9715	7.336	9.21497	4.01211
Fall 2015	IRL	IRL5	A. eburneus	8	-21.7568	31.9519	5.79096	8.05233	3.96803
Fall 2015	IRL	IRL5	A. eburneus	8	-21.1318	31.2014	6.00343	7.76665	4.01736
Fall 2015	IRL	IRL5	A. eburneus	6	-21.7613	31.6228	5.53989	7.99693	3.95437
Fall 2015	IRL	IRL5	A. eburneus	7	-20.8722	29.6292	6.06211	7.39669	4.00574
Fall 2015	IRL	IRL5	A. eburneus	7	-20.9517	30.5413	6.02989	7.68928	3.97193
Fall 2015	IRL	IRL5	A. eburneus	6	-22.0842	33.6484	5.2054	8.10562	4.15125
Fall 2015	IRL	IRL5	A. eburneus	5	-21.8643	31.9998	5.50517	8.34171	3.83612
Fall 2015	IRL	IRL5	A. eburneus	6	-21.9889	30.8482	5.87982	7.94073	3.88481
Fall 2015	IRL	IRL5	A. eburneus	8	-20.918	29.9821	6.03692	7.60237	3.94378
Fall 2015	IRL	IRL5	A. eburneus	9	-21.6248	34.7573	5.0516	8.2794	4.19805
Winter 2015	IRL	IRL5	A. eburneus	6.8	-22.9474	27.639	6.31092	6.24553	4.4254
Winter 2015	IRL	IRL5	A. eburneus	6.8	-22.3152	31.6048	6.53951	7.9332	3.98386
Winter 2015	IRL	IRL5	A. eburneus	6.8	-22.3612	32.119	5.72988	8.11978	3.95565
Winter 2015	IRL	IRL5	A. eburneus	6.8	-22.0553	35.2747	6.39752	8.89083	3.96753
Winter 2015	IRL	IRL5	A. eburneus	6.8	-22.265	33.082	5.84669	8.2807	3.99507
Winter 2015	IRL	IRL5	A. eburneus	6.8	-22.4973	34.0876	5.62818	7.87904	4.32637
Winter 2015	IRL	IRL5	A. eburneus	6.8	-22.262	31.6051	6.09542	7.49468	4.217
Winter 2015	IRL	IRL5	A. eburneus	6.8	-22.1873	33.2057	5.8618	7.97131	4.16565
Winter 2015	IRL	IRL5	A. eburneus	6.8	-22.2047	33.6427	6.25252	8.22632	4.08964
Winter 2015	IRL	IRL5	A. eburneus	6.8	-22.2374	32.0528	6.12161	7.90137	4.05661
Winter 2015	IRL	IRL5	A. eburneus	6.8	-21.9193	33.9478	6.47808	8.26998	4.10494
Winter 2015	IRL	IRL5	A. eburneus	6.8	-22.4635	31.0047	5.11964	7.63018	4.06343
Winter 2016-Bloom	IRL	IRL5	A. eburneus	5	-21.3477	32.5974	9.1134	7.94563	4.10256
Winter 2016-Bloom	IRL	IRL5	A. eburneus	5	-20.9924	36.2837	8.48706	8.81826	4.11462
Winter 2016-Bloom	IRL	IRL5	A. eburneus	5	-21.3913	24.4115	9.13123	5.95251	4.10104
Winter 2016-Bloom	IRL	IRL5	A. eburneus	6	-21.065	25.4472	9.36434	6.5333	3.895
Winter 2016-Bloom	IRL	IRL5	A. eburneus	6	-21.0728	32.4702	9.01357	7.96377	4.07724
Winter 2016-Bloom	IRL	IRL5	A. eburneus	5	-21.3184	33.8978	9.09649	8.30601	4.08112
Winter 2016-Bloom	IRL	IRL5	A. eburneus	5	-21.1593	32.0087	9.77711	8.30632	3.85353
Summer 2015	IRL	IRL5	A. eburneus	7	-18.2848	31.3432	8.84463	7.75438	4.04199
Summer 2015	IRL	IRL5	A. eburneus	10	-18.0127	31.5531	8.17165	7.99684	3.9457
Summer 2015	IRL	IRL5	A. eburneus	8	-17.8972	32.6041	9.09427	8.25279	3.95068
Summer 2015	IRL	IRL5	A. eburneus	11	-18.1786	31.5777	8.55708	7.97358	3.96029
Summer 2015	IRL	IRL5	A. eburneus	12	-17.9108	31.6024	8.71242	7.75049	4.07748
Summer 2015	IRL	IRL5	A. eburneus	6	-18.2007	32.1397	9.04258	8.31179	3.86676
Summer 2015	IRL	IRL5	A. eburneus	8	-18.3721	28.6186	8.38761	7.13994	4.00824
Summer 2015	IRL	IRL5	A. eburneus	8	-18.2578	36.9116	8.58267	9.22996	3.99911
Summer 2015	IRL	IRL5	A. eburneus	7	-18.1101	32.9129	8.8136	8.46593	3.88769
Summer 2015	IRL	IRL5	A. eburneus	6	-18.2325	29.9068	8.70445	7.70104	3.88347
Summer 2015	IRL	IRL5	A. eburneus	6	-18.2921	35.5204	8.59955	8.77274	4.04895
Spring 2015	IRL	IRL6	A. eburneus	4	-18.7015	37.3771	8.83894	8.96771	4.16796
Spring 2015	IRL	IRL6	A. eburneus	7	-19.1469	38.583	9.635	9.59141	4.02266
Spring 2015	IRL	IRL6	A. eburneus	7	-19.2494	37.9029	9.375	9.60084	3.94787
Spring 2015	IRL	IRL6	A. eburneus	5	-18.9778	39.8068	9.06	9.88755	4.02595
Spring 2015	IRL	IRL6	A. eburneus	7	-19.3539	34.5934	9.264	8.63587	4.00578
Spring 2015	IRL	IRL6	A. eburneus	14	-19.7147	37.7974	9.814	9.44914	4.00009
Spring 2015	IRL	IRL6	A. eburneus	9	-19.3457	40.0526	9.7	9.87263	4.05694
Spring 2015	IRL	IRL6	A. eburneus	8	-19.4831	38.9314	9.17	9.26711	4.20103
Spring 2015	IRL	IRL6	A. eburneus	6	-19.4503	38.782	9.577	9.41053	4.12113
Spring 2015	IRL	IRL6	A. eburneus	7	-18.9491	40.4448	9.095	10.323	3.91794
Fall 2015	IRL	IRL6	A. eburneus	8	-22.0533	34.8452	6.87712	8.10115	4.30126
Fall 2015	IRL	IRL6	A. eburneus	7	-21.2745	34.6291	5.28044	8.56982	4.04082
Fall 2015	IRL	IRL6	A. eburneus	6	-21.2353	34.9378	5.92937	8.96882	3.89548
Fall 2015	IRL	IRL6	A. eburneus	6	-21.1122	35.2995	5.71152	9.27581	3.80555
Fall 2015	IRL	IRL6	A. eburneus	6	-21.1044	34.1779	5.87311	8.83169	3.86992
Fall 2015	IRL	IRL6	A. eburneus	8	-20.3252	31.754	6.68752	8.14766	3.89732
Fall 2015	IRL	IRL6	A. eburneus	7	-20.9716	31.3833	4.65444	7.90779	3.96866
Fall 2015	IRL	IRL6	A. eburneus	6	-21.3391	35.1701	5.77536	9.18318	3.82984
Fall 2015	IRL	IRL6	A. eburneus	7	-18.4666	28.0374	7.7269	4.63665	6.04692
Fall 2015	IRL	IRL6	A. eburneus	6	-21.3393	33.1934	5.93593	8.62547	3.8483
Winter 2015	IRL	IRL6	A. eburneus	9.2	-21.3937	36.2949	9.12908	7.57659	4.7904
Winter 2015	IRL	IRL6	A. eburneus	9.2	-21.6345	27.374	8.80406	6.55063	4.17884
Winter 2015	IRL	IRL6	A. eburneus	9.2	-25.0504	34.5779	9.22779	8.23784	4.19745
Winter 2015	IRL	IRL6	A. eburneus	9.2	-22.0445	32.3734	8.71234	7.4461	4.34769
Winter 2015	IRL	IRL6	A. eburneus	9.2	-21.2081	34.2351	9.56976	6.95406	4.92303
Winter 2015	IRL	IRL6	A. eburneus	9.2	-23.9815	22.6564	8.46109	5.49448	4.12349
Winter 2015	IRL	IRL6	A. eburneus	9.2	-21.0286	33.4366	8.38632	8.48967	3.9385
Winter 2015	IRL	IRL6	A. eburneus	9.2	-23.5674	32.7154	8.55082	8.13757	4.02029
Winter 2015	IRL	IRL6	A. eburneus	9.2	-21.3346	34.8567	8.31553	8.29261	4.20335
Winter 2015	IRL	IRL6	A. eburneus	9.2	-20.8083	25.6676	9.29359	5.94953	4.31423
Winter 2015	IRL	IRL6	A. eburneus	9.2	-22.9401	33.716	8.58971	8.5967	3.92197
Winter 2015	IRL	IRL6	A. eburneus	9.2	-25.2228	30.1527	9.69937	8.11518	3.71559
Summer 2015	IRL	IRL6	A. eburneus	10	-17.3562	32.5638	9.3292	7.12247	4.57199
Summer 2015	IRL	IRL6	A. eburneus	10	-17.2147	30.5506	9.79817	7.92554	3.85471
Summer 2015	IRL	IRL6	A. eburneus	10	-17.5502	31.4697	8.9317	7.22505	4.35564
Summer 2015	IRL	IRL6	A. eburneus	9	-17.9493	30.612	8.3353	6.06414	5.04805
Summer 2015	IRL	IRL6	A. eburneus	7	-17.4378	31.2007	8.32154	6.98239	4.46849
Summer 2015	IRL	IRL6	A. eburneus	8	-17.6346	30.3972	8.26477	6.14618	4.94571
Summer 2015	IRL	IRL6	A. eburneus	10	-17.502	32.5699	8.71279	7.36499	4.42226
Summer 2015	IRL	IRL6	A. eburneus	8	-17.4292	30.5763	8.66778	6.55065	4.66768
Summer 2015	IRL	IRL6	A. eburneus	8	-17.4083	33.2524	8.46166	7.56463	4.39577
Summer 2015	IRL	IRL6	A. eburneus	6	-17.9183	33.6644	7.92871	5.87361	5.73146
Summer 2015	IRL	IRL6	A. eburneus	6	-17.3435	31.9372	7.57278	6.27598	5.0888
Summer 2015	IRL	IRL6	A. eburneus	6	-20.7255	36.1356	9.87885	6.78751	5.32383
Spring 2015	IRL	IRL7	A. eburneus	7	-20.3779	38.887	10.278	8.55382	4.54615
Spring 2015	IRL	IRL7	A. eburneus	7	-18.9368	37.6232	9.844	8.99884	4.1809
Spring 2015	IRL	IRL7	A. eburneus	11	-20.2641	28.7203	11.237	6.38135	4.50066
Spring 2015	IRL	IRL7	A. eburneus	6	-19.8654	35.3096	9.842	8.92145	3.95783
Spring 2015	IRL	IRL7	A. eburneus	8	-20.4896	38.9163	10.055	9.11854	4.26782
Spring 2015	IRL	IRL7	A. eburneus	9	-19.5087	32.9511	9.381	8.31516	3.96277
Spring 2015	IRL	IRL7	A. eburneus	10	-19.8326	38.3542	9.873	8.85759	4.33009
Spring 2015	IRL	IRL7	A. eburneus	8	-20.3451	30.5933	8.777	6.75627	4.52813
Spring 2015	IRL	IRL7	A. eburneus	10	-19.1612	33.5682	9.718	8.13598	4.12589
Spring 2015	IRL	IRL7	A. eburneus	10	-20.4671	39.5097	10.014	9.44168	4.18461
Fall 2015	IRL	IRL7	A. eburneus	10	-17.9551	34.6588	9.13249	8.56266	4.04766
Fall 2015	IRL	IRL7	A. eburneus	9	-17.22	31.1128	8.4761	7.59096	4.09866
Fall 2015	IRL	IRL7	A. eburneus	8	-16.5241	34.9397	9.17673	8.72537	4.00438
Fall 2015	IRL	IRL7	A. eburneus	9	-18.0945	35.8167	8.64382	8.16387	4.38722
Fall 2015	IRL	IRL7	A. eburneus	10	-18.1474	36.5118	8.2924	8.45956	4.31604
Fall 2015	IRL	IRL7	A. eburneus	10	-18.0738	35.7847	8.09615	8.12958	4.40179
Fall 2015	IRL	IRL7	A. eburneus	7	-17.9173	37.8292	8.3812	8.2308	4.59605
Fall 2015	IRL	IRL7	A. eburneus	9	-18.1772	35.6391	8.49708	8.72231	4.08597
Fall 2015	IRL	IRL7	A. eburneus	10	-17.9921	37.4634	9.07613	7.94563	4.71497
Fall 2015	IRL	IRL7	A. eburneus	8	-17.965	39.272	9.09879	9.83214	3.99425
Winter 2015	IRL	IRL7	A. eburneus	7.6	-23.3292	32.4017	9.93363	7.59282	4.26742
Winter 2015	IRL	IRL7	A. eburneus	7.6	-24.7739	35.0837	11.0221	8.96688	3.91258
Winter 2015	IRL	IRL7	A. eburneus	7.6	-23.6661	34.9004	10.5352	8.86212	3.93815
Winter 2015	IRL	IRL7	A. eburneus	7.6	-24.2001	29.2783	9.85013	5.67056	5.16321
Winter 2015	IRL	IRL7	A. eburneus	7.6	-24.3175	33.9182	10.5936	8.6923	3.90209
Winter 2015	IRL	IRL7	A. eburneus	7.6	-21.7946	32.5373	10.1942	8.10538	4.01428
Winter 2015	IRL	IRL7	A. eburneus	7.6	-25.0792	30.7273	11.0342	7.84982	3.9144
Winter 2015	IRL	IRL7	A. eburneus	7.6	-24.3787	35.0358	10.3692	8.81604	3.97409
Winter 2015	IRL	IRL7	A. eburneus	7.6	-23.0943	33.5895	9.2254	8.19	4.10128
Winter 2015	IRL	IRL7	A. eburneus	7.6	-20.0303	28.6166	10.4708	6.33264	4.5189
Summer 2015	IRL	IRL7	A. eburneus	6	-19.3266	35.3999	9.34237	8.24318	4.29445
Summer 2015	IRL	IRL7	A. eburneus	8	-19.8587	31.9125	9.0367	7.15185	4.46213
Summer 2015	IRL	IRL7	A. eburneus	10	-19.901	34.4843	8.98489	7.4089	4.65445
Summer 2015	IRL	IRL7	A. eburneus	6	-19.6299	32.4302	9.3411	7.68098	4.22214
Summer 2015	IRL	IRL7	A. eburneus	7	-19.4692	35.0015	9.28908	7.94187	4.4072
Summer 2015	IRL	IRL7	A. eburneus	6	-19.845	34.3181	9.51766	7.5726	4.53187
Summer 2015	IRL	IRL7	A. eburneus	10	-20.2003	35.5491	9.39647	7.15383	4.96924
Summer 2015	IRL	IRL7	A. eburneus	7	-19.4437	33.712	9.4987	8.04815	4.18879
Summer 2015	IRL	IRL7	A. eburneus	6	-19.3121	31.8532	9.03681	7.2635	4.38539
Summer 2015	IRL	IRL7	A. eburneus	7	-19.6734	35.5681	8.82559	7.62665	4.66366
Spring 2015	IRL	IRL8	A. eburneus	8	-20.2549	37.1582	10.352	8.68043	4.28069
Spring 2015	IRL	IRL8	A. eburneus	9	-19.9812	30.5017	10.297	6.73614	4.52806
Spring 2015	IRL	IRL8	A. eburneus	11	-19.6327	33.1646	9.935	8.19643	4.04623
Spring 2015	IRL	IRL8	A. eburneus	11	-19.9966	26.1267	10.416	5.70936	4.57611
Spring 2015	IRL	IRL8	A. eburneus	6	-20.6905	38.7003	9.7	8.25174	4.68995
Spring 2015	IRL	IRL8	A. eburneus	8	-19.5538	37.9949	9.887	9.79185	3.88025
Spring 2015	IRL	IRL8	A. eburneus	10	-20.8074	29.9211	10.381	6.35763	4.70633
Spring 2015	IRL	IRL8	A. eburneus	7	-19.7906	39.1503	10.175	10.0825	3.88298
Spring 2015	IRL	IRL8	A. eburneus	8	-20.259	32.9654	10.438	8.60694	3.83009
Spring 2015	IRL	IRL8	A. eburneus	5	-19.2668	37.505	10.013	9.94709	3.77045
Fall 2015	IRL	IRL8	A. eburneus	7	-18.3477	34.1892	10.5217	5.83387	5.86047
Fall 2015	IRL	IRL8	A. eburneus	8	-17.7295	38.6002	9.77751	8.30375	4.64852
Fall 2015	IRL	IRL8	A. eburneus	7	-19.5097	41.7336	9.66383	9.19434	4.53905
Fall 2015	IRL	IRL8	A. eburneus	6	-19.6222	37.3641	9.65408	9.30342	4.01616
Fall 2015	IRL	IRL8	A. eburneus	8	-17.8249	25.6795	9.84127	6.12606	4.19185
Fall 2015	IRL	IRL8	A. eburneus	5	-20.0397	18.2817	10.0631	3.93537	4.6455
Fall 2015	IRL	IRL8	A. eburneus	7	-18.4473	36.0053	9.88083	8.21113	4.38493
Fall 2015	IRL	IRL8	A. eburneus	8	-17.5488	43.2701	9.76716	5.57031	7.768
Fall 2015	IRL	IRL8	A. eburneus	8	-17.7916	34.8507	9.83218	7.40236	4.70805
Fall 2015	IRL	IRL8	A. eburneus	9	-17.5987	39.9735	9.74918	7.06282	5.6597
Winter 2015	IRL	IRL8	A. eburneus	7.4	-21.3697	25.1659	10.0465	4.15494	6.05686
Winter 2015	IRL	IRL8	A. eburneus	7.4	-24.4266	36.1089	9.14222	8.99087	4.01617
Winter 2015	IRL	IRL8	A. eburneus	7.4	-23.4362	34.8995	9.61978	8.29805	4.20575
Winter 2015	IRL	IRL8	A. eburneus	7.4	-22.0742	34.4273	10.3596	8.50554	4.04764
Winter 2015	IRL	IRL8	A. eburneus	7.4	-23.3627	33.0209	9.45129	8.28122	3.98744
Winter 2015	IRL	IRL8	A. eburneus	7.4	-23.9549	40.6302	8.97871	9.33897	4.35061
Winter 2015	IRL	IRL8	A. eburneus	7.4	-21.1012	35.0951	10.6028	5.47335	6.41199
Winter 2015	IRL	IRL8	A. eburneus	7.4	-22.743	33.2565	9.66764	8.54946	3.88989
Winter 2015	IRL	IRL8	A. eburneus	7.4	-24.0325	35.1463	9.0505	8.72347	4.02893
Winter 2015	IRL	IRL8	A. eburneus	7.4	-23.1126	34.1231	9.88	4.99505	6.83139
Winter 2015	IRL	IRL8	A. eburneus	7.4	-21.0287	33.4178	10.878	8.47276	3.94414
Winter 2015	IRL	IRL8	A. eburneus	7.4	-22.6347	32.1806	9.99067	8.32152	3.86715
Winter 2016-Bloom	IRL	IRL8	A. eburneus	8	-19.181	33.9632	11.3581	8.59129	3.95321
Winter 2016-Bloom	IRL	IRL8	A. eburneus	5	-19.9512	37.1741	11.8314	9.78362	3.79962
Winter 2016-Bloom	IRL	IRL8	A. eburneus	4	-19.8994	34.9282	11.8465	8.95656	3.89974
Winter 2016-Bloom	IRL	IRL8	A. eburneus	7	-20.5024	33.5324	11.3607	8.42506	3.98007
Winter 2016-Bloom	IRL	IRL8	A. eburneus	6	-18.9754	35.7981	10.931	8.20174	4.36469
Winter 2016-Bloom	IRL	IRL8	A. eburneus	6	-19.9949	36.8727	11.8566	9.25794	3.98282
Winter 2016-Bloom	IRL	IRL8	A. eburneus	8	-20.0335	32.5819	11.3672	7.84958	4.15078
Winter 2016-Bloom	IRL	IRL8	A. eburneus	6	-19.9602	34.9578	11.5228	8.77987	3.98158
Winter 2016-Bloom	IRL	IRL8	A. eburneus	6	-19.9575	36.1833	11.3458	9.27089	3.90289
Winter 2016-Bloom	IRL	IRL8	A. eburneus	7	-20.4467	30.9013	10.896	7.22695	4.27585
Summer 2015	IRL	IRL8	A. eburneus	11	-20.4089	28.7151	10.5915	5.19794	5.52433
Summer 2015	IRL	IRL8	A. eburneus	9	-19.3274	32.7516	9.96332	8.22557	3.98169
Summer 2015	IRL	IRL8	A. eburneus	10	-19.6179	31.9969	10.0895	7.75537	4.12577
Summer 2015	IRL	IRL8	A. eburneus	8	-19.7016	33.303	9.74933	8.00868	4.15836
Summer 2015	IRL	IRL8	A. eburneus	7	-20.142	33.8561	10.4266	7.42365	4.56057
Summer 2015	IRL	IRL8	A. eburneus	8	-19.7287	31.9831	9.90905	7.69059	4.15873
Summer 2015	IRL	IRL8	A. eburneus	11	-20.1783	36.3425	10.4641	7.95523	4.56838
Summer 2015	IRL	IRL8	A. eburneus	10	-19.9482	34.9092	10.3127	8.17632	4.26955
Summer 2015	IRL	IRL8	A. eburneus	12	-19.689	34.7522	9.82684	8.01308	4.33694
Spring 2015	IRL	IRL9	A. eburneus	6	-22.1836	33.061	10.7741	8.43759	3.9183
Spring 2015	IRL	IRL9	A. eburneus	7	-20.7588	35.731	11.0386	9.20156	3.88315
Spring 2015	IRL	IRL9	A. eburneus	6	-20.4755	37.0287	10.6288	9.10597	4.06642
Spring 2015	IRL	IRL9	A. eburneus	8	-20.4041	35.8183	10.1689	8.90629	4.02169
Spring 2015	IRL	IRL9	A. eburneus	7	-21.0567	33.1325	11.5225	8.94375	3.70454
Spring 2015	IRL	IRL9	A. eburneus	7	-20.7782	36.3335	10.9941	9.45176	3.8441
Spring 2015	IRL	IRL9	A. eburneus	7	-20.9502	35.3638	11.3185	9.01707	3.92188
Spring 2015	IRL	IRL9	A. eburneus	7	-20.0235	35.6027	10.2717	9.25788	3.84566
Spring 2015	IRL	IRL9	A. eburneus	7	-20.2856	35.8599	10.616	9.55624	3.75251
Spring 2015	IRL	IRL9	A. eburneus	7	-20.0235	35.5963	10.1076	9.15531	3.88805
Fall 2015	IRL	IRL9	A. eburneus	7	-18.7356	38.2005	9.59603	9.4691	4.03423
Fall 2015	IRL	IRL9	A. eburneus	9	-18.3364	36.954	9.91725	7.43865	4.96784
Fall 2015	IRL	IRL9	A. eburneus	10	-18.0515	36.9956	9.77231	8.32473	4.44406
Fall 2015	IRL	IRL9	A. eburneus	8	-18.0507	38.6004	9.89053	8.14838	4.73718
Fall 2015	IRL	IRL9	A. eburneus	8	-17.9926	30.4983	9.32627	6.81581	4.47464
Fall 2015	IRL	IRL9	A. eburneus	9	-18.8679	35.7933	10.0641	8.23544	4.34625
Fall 2015	IRL	IRL9	A. eburneus	8	-18.0565	35.7123	9.87518	7.55944	4.7242
Fall 2015	IRL	IRL9	A. eburneus	7	-18.6969	37.869	9.16426	8.69894	4.35329
Fall 2015	IRL	IRL9	A. eburneus	8	-18.6463	37.177	9.74849	7.61781	4.88027
Fall 2015	IRL	IRL9	A. eburneus	9	-18.5018	37.6216	9.49401	7.60508	4.94691
Winter 2015	IRL	IRL9	A. eburneus	9	-24.3388	31.293	8.78131	7.8236	3.99982
Winter 2015	IRL	IRL9	A. eburneus	9	-22.9063	41.5396	9.66664	6.59389	6.29971
Winter 2015	IRL	IRL9	A. eburneus	9	-24.1632	34.536	9.03754	8.62473	4.0043
Winter 2015	IRL	IRL9	A. eburneus	9	-23.6996	32.7852	9.9468	8.28063	3.95927
Winter 2015	IRL	IRL9	A. eburneus	9	-25.2567	37.9339	8.42139	9.07284	4.18103
Winter 2015	IRL	IRL9	A. eburneus	9	-24.4123	35.8167	9.30473	8.46601	4.23065
Winter 2015	IRL	IRL9	A. eburneus	9	-23.8375	31.3271	8.75239	8.16615	3.83621
Winter 2015	IRL	IRL9	A. eburneus	9	-24.1622	33.2167	8.79526	7.98593	4.1594
Winter 2015	IRL	IRL9	A. eburneus	9	-23.9212	33.518	8.93883	8.22029	4.07747
Winter 2015	IRL	IRL9	A. eburneus	9	-23.1258	30.5613	9.85707	7.44326	4.1059
Winter 2015	IRL	IRL9	A. eburneus	9	-24.3276	26.3268	8.76635	6.50817	4.0452
Winter 2015	IRL	IRL9	A. eburneus	9	-23.669	36.9529	9.72447	9.14154	4.04231
Summer 2015	IRL	IRL9	A. eburneus	11	-18.8932	36.1657	9.39043	7.81325	4.62877
Summer 2015	IRL	IRL9	A. eburneus	8	-18.2497	34.5015	9.6133	8.65421	3.98668
Summer 2015	IRL	IRL9	A. eburneus	7	-18.7257	33.3292	9.63087	8.34707	3.99292
Summer 2015	IRL	IRL9	A. eburneus	6	-19.3645	34.7606	9.70913	7.36933	4.71693
Summer 2015	IRL	IRL9	A. eburneus	6	-19.8203	36.1227	9.4785	7.18588	5.0269
Summer 2015	IRL	IRL9	A. eburneus	5	-19.2213	33.5992	9.28131	7.00601	4.79577
Summer 2015	IRL	IRL9	A. eburneus	5	-18.8585	35.5323	9.6234	7.97162	4.45736
Summer 2015	IRL	IRL9	A. eburneus	10	-18.6663	34.2115	9.58756	8.45129	4.04808
Summer 2015	IRL	IRL9	A. eburneus	7	-19.568	37.849	9.1415	7.97331	4.74697
Summer 2015	IRL	IRL9	A. eburneus	6	-20.9351	36.2805	9.1096	5.93663	6.1113
Fall 2015	Mosquito	M1	A. eburneus	7	-22.0628	42.6405	7.78126	10.3074	4.1369
Fall 2015	Mosquito	M1	A. eburneus	7	-21.6692	38.6188	7.81063	9.12961	4.23006
Fall 2015	Mosquito	M1	A. eburneus	5	-20.5314	30.0656	8.19295	7.63766	3.9365
Fall 2015	Mosquito	M1	A. eburneus	5	-21.6592	33.7725	8.0006	8.74939	3.85998
Fall 2015	Mosquito	M1	A. eburneus	5	-21.2505	27.3682	8.01902	7.76603	3.52409
Fall 2015	Mosquito	M1	A. eburneus	6	-21.3012	31.5033	7.55522	8.32879	3.78246
Fall 2015	Mosquito	M1	A. eburneus	7	-20.9816	33.3325	7.72046	8.60156	3.87517
Winter 2015	Mosquito	M1	A. eburneus	10.6	-19.8354	34.5362	8.336	8.82133	3.91508
Winter 2015	Mosquito	M1	A. eburneus	10.6	-20.5454	36.2311	8.61393	8.6462	4.19041
Winter 2015	Mosquito	M1	A. eburneus	10.6	-22.1054	25.7984	6.58181	3.87832	6.65196
Winter 2015	Mosquito	M1	A. eburneus	10.6	-20.4134	34.4494	8.0913	8.46445	4.06989
Winter 2015	Mosquito	M1	A. eburneus	10.6	-21.2113	39.3639	8.63508	8.496	4.63322
Winter 2015	Mosquito	M1	A. eburneus	10.6	-21.0814	29.4446	7.95938	5.9673	4.93432
Winter 2015	Mosquito	M1	A. eburneus	10.6	-20.9341	35.8347	8.21113	8.26467	4.33589
Winter 2015	Mosquito	M1	A. eburneus	10.6	-20.885	28.5259	7.67541	6.27446	4.54634
Winter 2015	Mosquito	M1	A. eburneus	10.6	-20.8062	36.6691	7.75295	8.84771	4.14447
Winter 2015	Mosquito	M1	A. eburneus	10.6	-20.9658	35.5604	7.81236	8.2144	4.32904
Winter 2015	Mosquito	M1	A. eburneus	10.6	-20.7929	30.1022	8.04296	7.10593	4.2362
Summer 2015	Mosquito	M1	A. eburneus	11	-20.575	33.4275	7.49272	8.61753	3.87901
Summer 2015	Mosquito	M1	A. eburneus	7	-20.0296	26.2919	6.79357	7.19752	3.65291
Summer 2015	Mosquito	M1	A. eburneus	11	-20.176	32.623	7.44156	8.72056	3.74093
Summer 2015	Mosquito	M1	A. eburneus	5	-20.2019	27.05	6.66785	7.03753	3.84369
Summer 2015	Mosquito	M1	A. eburneus	7	-20.0804	13.8406	7.13942	3.52641	3.92484
Summer 2015	Mosquito	M1	A. eburneus	4	-20.1743	30.9925	7.08167	7.96211	3.8925
Summer 2015	Mosquito	M1	A. eburneus	6	-20.4443	30.5865	6.87071	7.78132	3.93076
Summer 2015	Mosquito	M1	A. eburneus	5	-20.0882	33.537	6.20818	8.58212	3.90778
Summer 2015	Mosquito	M1	A. eburneus	7	-19.7855	33.4079	7.05367	8.65094	3.86176
Summer 2015	Mosquito	M1	A. eburneus	7	-19.8963	34.8298	6.95489	8.84704	3.93688
Fall 2015	Mosquito	M2	A. eburneus	11	-21.059	36.9439	7.37847	9.8006	3.76956
Fall 2015	Mosquito	M2	A. eburneus	9	-21.0953	25.9954	10.2499	6.81927	3.81205
Fall 2015	Mosquito	M2	A. eburneus	10	-22.1733	38.1334	8.06346	9.86311	3.86626
Fall 2015	Mosquito	M2	A. eburneus	11	-21.3712	26.9407	9.94001	6.86992	3.92154
Fall 2015	Mosquito	M2	A. eburneus	10	-22.3814	37.6403	7.50522	9.74232	3.86358
Fall 2015	Mosquito	M2	A. eburneus	8	-21.0169	35.8127	7.36449	9.30909	3.84707
Fall 2015	Mosquito	M2	A. eburneus	9	-20.828	35.2095	7.58622	9.34448	3.76795
Fall 2015	Mosquito	M2	A. eburneus	10	-22.0873	42.33	7.56555	10.978	3.85589
Fall 2015	Mosquito	M2	A. eburneus	10	-20.9951	33.9138	7.8788	9.15258	3.70538
Fall 2015	Mosquito	M2	A. eburneus	7	-20.7382	16.9223	11.7383	3.55469	4.76057
Winter 2015	Mosquito	M2	A. eburneus	8.2	-21.1187	31.9672	7.44881	7.26569	4.39975
Winter 2015	Mosquito	M2	A. eburneus	8.2	-20.695	33.4893	7.60071	8.30614	4.03187
Winter 2015	Mosquito	M2	A. eburneus	8.2	-21.0636	36.3232	7.59971	8.423	4.31238
Winter 2015	Mosquito	M2	A. eburneus	8.2	-20.8828	28.1709	7.49709	6.6015	4.26735
Winter 2015	Mosquito	M2	A. eburneus	8.2	-20.791	30.3675	7.69427	7.5245	4.03581
Winter 2015	Mosquito	M2	A. eburneus	8.2	-21.2259	32.4473	7.50816	7.39299	4.38893
Winter 2015	Mosquito	M2	A. eburneus	8.2	-20.7358	30.3783	7.33513	7.345	4.13591
Winter 2015	Mosquito	M2	A. eburneus	8.2	-20.8492	34.4659	7.47094	8.45972	4.07412
Winter 2015	Mosquito	M2	A. eburneus	8.2	-21.0421	32.2196	7.2969	7.55153	4.26663
Summer 2015	Mosquito	M2	A. eburneus	22	-19.866	29.5399	7.60873	6.90053	4.28082
Summer 2015	Mosquito	M2	A. eburneus	23	-19.7512	32.1196	7.20723	7.58127	4.2367
Summer 2015	Mosquito	M2	A. eburneus	18	-20.131	36.6404	7.23679	8.25466	4.43875
Summer 2015	Mosquito	M2	A. eburneus	9	-19.7618	36.1477	6.2792	8.43815	4.28385
Summer 2015	Mosquito	M2	A. eburneus	12	-19.9324	27.8693	6.41251	6.55561	4.25121
Summer 2015	Mosquito	M2	A. eburneus	8	-19.5418	32.493	7.36542	7.99559	4.06386
Summer 2015	Mosquito	M2	A. eburneus	6	-19.6616	32.793	7.56143	7.81792	4.1946
Summer 2015	Mosquito	M2	A. eburneus	10	-19.6566	30.8623	6.72236	7.08033	4.35888
Summer 2015	Mosquito	M2	A. eburneus	10	-20.5491	26.8683	7.20511	5.74329	4.67821
Summer 2015	Mosquito	M2	A. eburneus	13	-20.0087	33.601	6.63136	7.57206	4.4375
Spring 2015	Mosquito	M4	A. eburneus	10	-19.0745	33.8222	6.675	8.37553	4.03821
Spring 2015	Mosquito	M4	A. eburneus	11	-18.9622	35.9234	7.243	8.9908	3.99557
Spring 2015	Mosquito	M4	A. eburneus	10	-18.6117	35.9271	7.439	9.38724	3.82723
Spring 2015	Mosquito	M4	A. eburneus	14	-18.8561	33.1957	6.829	8.25408	4.02173
Spring 2015	Mosquito	M4	A. eburneus	9	-19.1515	38.0468	7.522	8.34617	4.55859
Spring 2015	Mosquito	M4	A. eburneus	15	-18.7615	30.1869	7.012	7.32657	4.12019
Spring 2015	Mosquito	M4	A. eburneus	11	-18.5888	35.8991	8.302	9.26513	3.87465
Spring 2015	Mosquito	M4	A. eburneus	11	-18.8312	32.9498	7.3	8.69057	3.79144
Spring 2015	Mosquito	M4	A. eburneus	10	-18.93	30.1555	6.327	7.15214	4.21629
Spring 2015	Mosquito	M4	A. eburneus	10	-19.0277	33.0194	6.742	8.13395	4.05945
Fall 2015	Mosquito	M4	A. eburneus	9	-20.2994	33.2404	7.89152	8.51492	3.90378
Fall 2015	Mosquito	M4	A. eburneus	7	-21.2542	34.4937	7.22698	8.62835	3.99772
Fall 2015	Mosquito	M4	A. eburneus	7	-20.9554	34.636	7.85022	8.81139	3.93083
Fall 2015	Mosquito	M4	A. eburneus	7	-20.9934	34.5221	7.63809	8.9417	3.8608
Fall 2015	Mosquito	M4	A. eburneus	7	-20.7394	34.4421	7.84874	8.49992	4.05204
Fall 2015	Mosquito	M4	A. eburneus	10	-20.2434	23.6917	7.46759	6.14258	3.85696
Fall 2015	Mosquito	M4	A. eburneus	7	-21.0357	32.8916	7.68609	8.35803	3.93533
Fall 2015	Mosquito	M4	A. eburneus	7	-20.8334	34.5035	7.81415	9.04718	3.81374
Fall 2015	Mosquito	M4	A. eburneus	5	-20.935	34.6953	7.42561	9.00754	3.85181
Fall 2015	Mosquito	M4	A. eburneus	8	-20.9363	33.8982	7.53312	8.5019	3.98713
Winter 2015	Mosquito	M4	A. eburneus	7.6	-20.3187	32.5109	7.22827	8.33393	3.90103
Winter 2015	Mosquito	M4	A. eburneus	7.6	-20.2511	30.4129	7.56552	8.06436	3.77127
Winter 2015	Mosquito	M4	A. eburneus	7.6	-20.2961	30.991	7.28168	7.9983	3.8747
Winter 2015	Mosquito	M4	A. eburneus	7.6	-20.7197	34.6651	7.0552	8.65714	4.00422
Winter 2015	Mosquito	M4	A. eburneus	7.6	-20.154	32.9839	7.55267	8.83488	3.73337
Winter 2015	Mosquito	M4	A. eburneus	7.6	-20.8915	38.2059	7.67233	8.99041	4.24962
Winter 2015	Mosquito	M4	A. eburneus	7.6	-20.1437	31.9277	7.20849	8.0958	3.94373
Winter 2015	Mosquito	M4	A. eburneus	7.6	-20.4465	31.832	7.58036	7.86885	4.04531
Winter 2015	Mosquito	M4	A. eburneus	7.6	-20.3616	26.3565	7.14124	6.65109	3.96274
Winter 2015	Mosquito	M4	A. eburneus	7.6	-20.6532	37.9385	7.44487	9.5748	3.96233
Winter 2015	Mosquito	M4	A. eburneus	7.6	-20.4179	36.8598	7.30443	9.28822	3.96845
Winter 2015	Mosquito	M4	A. eburneus	7.6	-20.5611	27.7058	7.20058	7.1196	3.89149
Winter 2015	Mosquito	M4	A. eburneus	7.6	-20.1908	31.6523	7.45574	8.1976	3.86117
Summer 2015	Mosquito	M4	A. eburneus	10	-18.4083	40.645	6.6116	9.79224	4.15073
Summer 2015	Mosquito	M4	A. eburneus	11	-18.4792	39.0244	7.2561	9.26646	4.21136
Summer 2015	Mosquito	M4	A. eburneus	8	-17.8856	37.8242	6.9704	9.2881	4.07232
Summer 2015	Mosquito	M4	A. eburneus	10	-17.8149	38.068	7.08038	9.18078	4.14649
Summer 2015	Mosquito	M4	A. eburneus	7	-18.0699	38.0468	6.92338	9.22798	4.12298
Summer 2015	Mosquito	M4	A. eburneus	9	-17.6581	36.1172	6.85215	8.83636	4.08734
Summer 2015	Mosquito	M4	A. eburneus	8	-18.3007	43.2738	6.97171	10.4655	4.13488
Summer 2015	Mosquito	M4	A. eburneus	8	-18.4775	43.6794	6.4275	10.1358	4.3094
Summer 2015	Mosquito	M4	A. eburneus	8	-17.9944	43.9487	6.80981	10.4155	4.21954
Summer 2015	Mosquito	M4	A. eburneus	6	-18.3865	33.1755	6.5579	8.11611	4.08761
Fall 2015	Mosquito	M5	A. eburneus	8	-20.1929	30.5445	8.26629	8.20439	3.72295
Fall 2015	Mosquito	M5	A. eburneus	7	-20.2241	29.2432	8.20195	7.80445	3.74699
Fall 2015	Mosquito	M5	A. eburneus	6	-20.7708	31.7063	7.40863	8.44173	3.7559
Fall 2015	Mosquito	M5	A. eburneus	8	-21.5993	29.7735	8.75941	6.10389	4.87778
Fall 2015	Mosquito	M5	A. eburneus	7	-20.3625	31.3034	7.71404	8.0245	3.90097
Fall 2015	Mosquito	M5	A. eburneus	10	-19.3318	28.7003	8.11833	7.53505	3.8089
Fall 2015	Mosquito	M5	A. eburneus	9	-20.0245	35.93	8.03549	8.82314	4.07225
Fall 2015	Mosquito	M5	A. eburneus	7	-20.0962	34.9446	8.05499	8.87859	3.93583
Fall 2015	Mosquito	M5	A. eburneus	9	-20.2121	32.2198	8.5404	7.84228	4.10847
Winter 2015	Mosquito	M5	A. eburneus	8	-20.0579	36.6104	7.23252	9.08459	4.02995
Winter 2015	Mosquito	M5	A. eburneus	8	-20.0364	34.603	7.31702	8.40988	4.11456
Winter 2015	Mosquito	M5	A. eburneus	8	-20.3734	35.6854	8.01921	8.99678	3.96647
Winter 2015	Mosquito	M5	A. eburneus	8	-19.8486	30.0594	7.69025	7.59415	3.95824
Winter 2015	Mosquito	M5	A. eburneus	8	-19.9415	29.1658	7.55343	7.14502	4.08198
Summer 2015	Mosquito	M5	A. eburneus	7	-18.0437	36.0247	7.39173	7.60601	4.73635
Summer 2015	Mosquito	M5	A. eburneus	9	-18.5315	40.472	7.27675	4.64547	8.71214
Summer 2015	Mosquito	M5	A. eburneus	9	-18.0252	32.7407	6.47401	7.16498	4.56955
Summer 2015	Mosquito	M5	A. eburneus	9	-17.6738	36.6054	7.94187	6.94697	5.26926
Summer 2015	Mosquito	M5	A. eburneus	6	-19.6629	33.9309	7.51671	9.99755	3.39392
Summer 2015	Mosquito	M5	A. eburneus	8	-17.8514	37.6762	7.0465	8.30067	4.53893
Summer 2015	Mosquito	M5	A. eburneus	5	-17.8401	37.7234	7.30199	8.23573	4.58046
Summer 2015	Mosquito	M5	A. eburneus	10	-17.9779	39.8208	7.30796	7.51149	5.30131
Summer 2015	Mosquito	M6	A. eburneus	15	-17.8082	28.1369	6.32537	7.35907	3.82343
Summer 2015	Mosquito	M6	A. eburneus	15	-17.936	33.9552	6.35822	7.80238	4.3519
Summer 2015	Mosquito	M6	A. eburneus	14	-19.1452	36.6959	6.36312	7.90429	4.64253
Summer 2015	Mosquito	M6	A. eburneus	11	-17.3383	32.9401	6.23973	8.43201	3.90655
Summer 2015	Mosquito	M6	A. eburneus	14	-17.7313	31.499	6.28687	7.46085	4.22191
Summer 2015	Mosquito	M6	A. eburneus	10	-17.4844	35.0405	6.44283	8.86762	3.95151
Summer 2015	Mosquito	M6	A. eburneus	11	-17.6651	35.9018	6.01704	9.01471	3.98259
Summer 2015	Mosquito	M6	A. eburneus	10	-17.4652	25.5322	7.22271	6.8086	3.75
Summer 2015	Mosquito	M6	A. eburneus	8	-17.7147	33.3145	6.28319	8.10362	4.11106
Summer 2015	Mosquito	M6	A. eburneus	7	-17.3967	29.7214	6.68426	7.67979	3.87008

## Sheet: raw POM data
Collection Period	Lagoon	Site	d15N	d13C
Winter 2015	Banana	B1	5.53117	-21.1612
Winter 2015	Banana	B2	6.75894	-22.6082
Winter 2015	Banana	B4	5.36234	-16.6236
Winter 2015	Banana	B5	4.86284	-23.0342
Winter 2015	Banana	B6	4.52018	-23.9594
Winter 2015	Banana	B6alt	5.82587	-21.9143
Winter 2015	Banana	B7	6.12657	-22.4493
Winter 2015	Banana	B8	6.1026	-22.7366
Winter 2015	Banana	B9	6.3014	-23.6507
Winter 2015	IRL	IRL1	2.02868	-23.3613
Winter 2015	IRL	IRL2	4.07363	-21.6381
Winter 2015	IRL	IRL3	4.703	-23.0984
Winter 2015	IRL	IRL4	4.76394	-22.8681
Winter 2015	IRL	IRL5	1.49421	-27.1703
Winter 2015	IRL	IRL6	6.61708	-23.9115
Winter 2015	IRL	IRL7	7.03467	-27.0368
Winter 2015	IRL	IRL8	6.78891	-22.9088
Winter 2015	IRL	IRL10	8.43027	-24.3232
Winter 2015	IRL	IRL11	7.37732	-25.2648
Winter 2015	IRL	IRL12	6.55315	-23.563
Winter 2015	IRL	IRL13	7.44326	-23.1208
Winter 2015	Mosquito	M1	5.33936	-22.166
Winter 2015	Mosquito	M2	4.92677	-23.1473
Winter 2015	Mosquito	M4	3.87483	-22.0406
Winter 2015	Mosquito	M5	4.35734	-22.3341
Winter 2015	Mosquito	M6	4.18652	-22.5807
Spring 2015	Banana	B4	5.50775	-20.5482
Spring 2015	Banana	B5	5.73737	-23.6103
Spring 2015	Banana	B6	7.24328	-22.5109
Spring 2015	Banana	B6alt	7.87944	-21.4918
Spring 2015	Banana	B7	7.70052	-19.7551
Spring 2015	Banana	B8	6.793	-23.3324
Spring 2015	Banana	B9	7.03255	-23.4861
Spring 2015	IRL	IRL1	3.8607	-21.838
Spring 2015	IRL	IRL2	1.43534	-21.33
Spring 2015	IRL	IRL3	3.38159	-20.201
Spring 2015	IRL	IRL4	2.95715	-21.8685
Spring 2015	IRL	IRL5	5.38649	-24.045
Spring 2015	IRL	IRL6	4.36366	-20.6103
Spring 2015	IRL	IRL7	5.09027	-21.1803
Spring 2015	IRL	IRL11	6.04253	-20.8098
Spring 2015	IRL	IRL12	6.50772	-22.0935
Spring 2015	IRL	IRL13	6.87053	-22.0049
Spring 2015	Mosquito	M4	3.78018	-20.9381
Spring 2015	Mosquito	M5	3.70265	-22.4691
Spring 2015	Mosquito	M6	3.30803	-19.6442
Summer 2015	Banana	B1	7.51075	-19.0861
Summer 2015	Banana	B2	7.1619	-19.9153
Summer 2015	Banana	B4	6.45474	-18.9629
Summer 2015	Banana	B5	6.23031	-19.9297
Summer 2015	Banana	B6	6.48387	-23.6091
Summer 2015	Banana	B6alt	6.80522	-22.1336
Summer 2015	Banana	B7	8.58247	-22.4982
Summer 2015	Banana	B8	5.6382	-22.1952
Summer 2015	Banana	B9	5.14387	-22.3509
Summer 2015	IRL	IRL2	6.84874	-17.0044
Summer 2015	IRL	IRL3	2.57805	-18.6035
Summer 2015	IRL	IRL4	6.55546	-17.5666
Summer 2015	IRL	IRL5	4.89745	-22.9224
Summer 2015	IRL	IRL6	6.70101	-17.8681
Summer 2015	IRL	IRL7	8.23541	-19.318
Summer 2015	IRL	IRL8	7.52093	-20.7012
Summer 2015	IRL	IRL9	7.60083	-19.7697
Summer 2015	IRL	IRL10	8.39632	-19.8067
Summer 2015	IRL	IRL12	5.88246	-20.4566
Summer 2015	IRL	IRL13	7.00906	-21.1426
Summer 2015	Mosquito	M1	3.88912	-22.9169
Summer 2015	Mosquito	M2	3.96787	-23.6335
Summer 2015	Mosquito	M4	4.46301	-21.3176
Summer 2015	Mosquito	M5	5.22406	-20.198
Summer 2015	Mosquito	M6	4.93863	-20.3295
Fall 2015	Banana	B1	5.0258	-22.2842
Fall 2015	Banana	B2alt	6.9785	-23.6224
Fall 2015	Banana	B4	7.9739	-23.7268
Fall 2015	Banana	B5	5.12715	-23.4591
Fall 2015	Banana	B6	8.39949	-26.9441
Fall 2015	Banana	B6alt	2.81637	-21.3177
Fall 2015	Banana	B7	8.14647	-19.6754
Fall 2015	Banana	B8	6.58547	-26.4712
Fall 2015	Banana	B9	7.18542	-26.0958
Fall 2015	IRL	IRL1	3.97687	-25.2594
Fall 2015	IRL	IRL2	5.78252	-25.1265
Fall 2015	IRL	IRL3	6.3201	-21.5797
Fall 2015	IRL	IRL4	8.44978	-22.556
Fall 2015	IRL	IRL5	5.14927	-24.216
Fall 2015	IRL	IRL6	6.7953	-21.8657
Fall 2015	IRL	IRL7	5.87658	-21.5999
Fall 2015	IRL	IRL8	7.88037	-21.1692
Fall 2015	IRL	IRL9	8.79718	-20.7555
Fall 2015	IRL	IRL10	7.10283	-20.9078
Fall 2015	IRL	IRL11	8.90136	-20.7761
Fall 2015	IRL	IRL12	8.64408	-20.9841
Fall 2015	IRL	IRL13	9.43013	-21.293
Fall 2015	Mosquito	M1	4.57309	-24.2559
Fall 2015	Mosquito	M2	3.83612	-24.7232
Fall 2015	Mosquito	M4	4	-24.1557
Fall 2015	Mosquito	M5	4.36391	-24.8424
Winter 2016-Aureo Bloom	Banana	B1	7.62099	-18.9349
Winter 2016-Aureo Bloom	Banana	B2	7.79434	-18.6655
Winter 2016-Aureo Bloom	Banana	B8	7.03931	-21.023
Winter 2016-Aureo Bloom	Banana	B9	6.84944	-21.5736
Winter 2016-Aureo Bloom	IRL	IRL4	5.81911	-25.8477
Winter 2016-Aureo Bloom	IRL	IRL5	5.67327	-26.0171
Winter 2016-Aureo Bloom	IRL	IRL6	6.29274	-24.9034
Winter 2016-Aureo Bloom	IRL	IRL8	7.08109	-24.262
Winter 2016-Aureo Bloom	IRL	IRL10	6.96937	-22.1727
Winter 2016-Aureo Bloom	IRL	IRL11	7.03255	-22.1555
Winter 2016-Aureo Bloom	IRL	IRL12	7.02187	-22.3882
